---

# THE NEURAL LINK BETWEEN SUBJECTIVE VALUE AND DECISION ENTROPY

---

A PREPRINT

**Sebastian Bobadilla-Suarez\***

Department of Experimental Psychology  
University College London  
26 Bedford Way, London, WC1H 0AP  
sebastian.suarez.12@ucl.ac.uk

**Olivia Guest**

Research Centre on Interactive Media,  
Smart Systems and Emerging Technologies — RISE,  
Nicosia, Cyprus  
o.guest@rise.org.cy

Department of Experimental Psychology  
University College London  
26 Bedford Way, London, WC1H 0AP  
o.guest@ucl.ac.uk

**Bradley C. Love**

Department of Experimental Psychology  
University College London  
26 Bedford Way, London, WC1H 0AP

The Alan Turing Institute  
British Library, 96 Euston Road, London NW1 2DB  
b.love@ucl.ac.uk

February 18, 2020

## ABSTRACT

We evaluated whether the brain organises value and confidence signals in a systematic fashion that reflects the overall desirability of decision options. If so, regions that respond positively to increases in value should also respond positively to increases in confidence. Likewise, regions that respond negatively to both value and confidence should be widespread. We strongly confirmed these predictions through a model-based fMRI analysis of a mixed gambles task that assessed subjective value (SV) and inverse decision entropy (iDE), which is related to confidence. Purported value areas more strongly signalled iDE than SV, underscoring how intertwined value and confidence are. Smooth maps tied to the desirability of actions transitioned from positive SV and iDE in ventromedial prefrontal cortex to negative SV and iDE in dorsal medial prefrontal cortex. This non-accidental organisation of SV and iDE signals was found across the brain and was strongest in purported value areas.

**Keywords** Decision entropy · Decision making · Risk · Confidence · Subjective value · fMRI

## 1 Introduction

Subjective value (SV) and inverse decision entropy (iDE) are closely linked concepts. For instance, people tend to be highly confident (i.e., high iDE) in accepting a high-value option (e.g., their dream job). Similarly, they are confident when rejecting a low-value option (e.g., spoiled milk). For middling-values, people will be uncertain of what choice to make and confidence will be low (i.e., low iDE).

---

\*corresponding author

The relationship between SV and iDE can be described by a simple mathematical function that transforms SV into the probability of accepting an option (Figure 1b; Domenech et al., 2017; Duverne & Koechlin, 2017; Lebreton et al., 2015; Rouault et al., 2019) and this probability in turn can be transformed into iDE. Although closely related conceptually, SV and iDE need not correlate [1b]. Indeed, all combinations of low and high values are possible for SV and iDE (see Figure 1c).

Although value and confidence are interlinked, until recently research has heavily focused on value. At its inception, neuroeconomics emphasized the study of expected decision utility (i.e., subjective value, Camerer et al., 2005; Glimcher, 2008; Padoa-Schioppa, 2007; Platt & Glimcher, 1999; Sanfey et al., 2003; Shizgal, 1997; Shizgal & Conover, 1996). Likewise, early single-cell recordings in monkeys (Padoa-Schioppa & Assad, 2006) and functional magnetic resonance imaging (fMRI) studies in humans (e.g., Tom et al., 2007) focused on value. Value also plays the leading role in motivation research on approach-avoidance (Cain & LeDoux, 2008; Elliot & Church, 1997; Hull, 1952; Vroom, 1964).

Subsequent research in value-based decision considered measures related to confidence, such as risk and decision uncertainty (i.e., confidence, De Martino et al., 2013; Huettel et al., 2006; Lebreton et al., 2015). For example, decision confidence can be operationalized as a quadratic transform of subjective value (i.e., with an inverted-U relation to value, Domenech et al., 2017; Duverne & Koechlin, 2017; Lebreton et al., 2015; Rouault et al., 2019) and a sigmoidal relation with choice probability (see Figure 1b), estimated from a cognitive model (De Martino et al., 2013; Meyniel et al., 2015; Rouault et al., 2018), or elicited as a subjective rating (Fleming et al., 2012; De Martino et al., 2013, 2017). Algorithmic proposals link confidence to evidence accumulation in value-based decision making (De Martino et al., 2013; Kepecs et al., 2008; Kiani et al., 2014);

Although some believe that neural confidence signals have few consequences for downstream processing (Barron et al., 2015; FitzGerald et al., 2009; Hunt et al., 2012), others suggest that confidence signals can serve metacognitive functions (Fleming & Daw, 2017; Yeung & Summerfield, 2012) or as an assessment of choice accuracy (De Martino et al., 2013; Fleming et al., 2012). Monitoring one's confidence can lead one to change course (Folke et al., 2017; Resulaj et al., 2009) and can help guide future decisions (Lau & Rosenthal, 2011). Communicating one's confidence to others could be useful in group decision making (Bahrami et al., 2012; Bang et al., 2014). More generally, notions of uncertainty, which are related to confidence, play key roles in a number of cognitive acts, such as in information-seeking (Bromberg-Martin & Hikosaka, 2009; Charpentier et al., 2018), active sampling (Gottlieb & Oudeyer, 2018), evidence accumulation (Ratcliff & Rouder, 1998; Usher & McClelland, 2001), risk aversion (Hayden & Platt, 2007; Huettel et al., 2006; Kacelnik & Bateson, 1996), and in Bayesian models of cognition generally.

Although commonly associated with vmPFC (Basten et al., 2010; Behrens et al., 2008; Levy & Glimcher, 2012; Plassmann et al., 2007), value and confidence signals can be found throughout the brain, such as in ventral striatum (Boorman et al., 2009), anterior cingulate cortex (Rushworth & Behrens, 2008; Tom et al., 2007), amygdala (De Martino et al., 2010), certain parietal (Sugrue et al., 2004) and insular areas (Bartra et al., 2013).

One interesting question is how these value and confidence signals relate. One idea is that the evidence accumulation with respect to a value comparison process is performed in vmPFC and the confidence in this decision is explicitly represented in rostrolateral PFC, enabling verbal reports of confidence (De Martino et al., 2013; Fleming et al., 2012). In line with the notion that subjective value and confidence are interlinked, confidence signals have been found more dorsally than subjective value on the medial surface of prefrontal cortex (De Martino et al., 2013, 2017; Lebreton et al., 2015). Although confidence or decision entropy can accompany subjective value computations for many of the mentioned regions (De Martino et al., 2013; Kepecs et al., 2008; Rolls et al., 2010), it is not yet clear whether areas that encode value also encode confidence and vice versa. At this juncture, rather than focusing on their localization, we suggest mapping the relationship between confidence and value throughout the brain.

Lebreton et al. (2015) suggested that representations of value and confidence are combined into a single quantity. Intuitively, confidence can be seen as having value in-and-of-itself that inflates the basic value signal. We find this basic account appealing, but incomplete. Lebreton et al. (2015) focused on the case of positive value and high (i.e., positive) confidence in vmPFC. If value and confidence signals are truly intertwined, then there should also be regions that code the converse, negative value and low confidence. Evaluating uncertainty negatively is consistent with studies of risk aversion both in humans (Huettel et al., 2006) and non-human primates (Hayden & Platt, 2007; Kacelnik & Bateson, 1996).

Moreover, one might expect cortical maps that smoothly vary from positive options (high value, high confidence) to negative options (low value, low confidence). According to this account, the distribution of voxels across the brain that code for value and confidence will be highly non-accidental: (1) voxels that code for value should also code for confidence; and vice versa, (2) most voxels sensitive to value and confidence should either code for negative value and low confidence or positive value and high confidence.

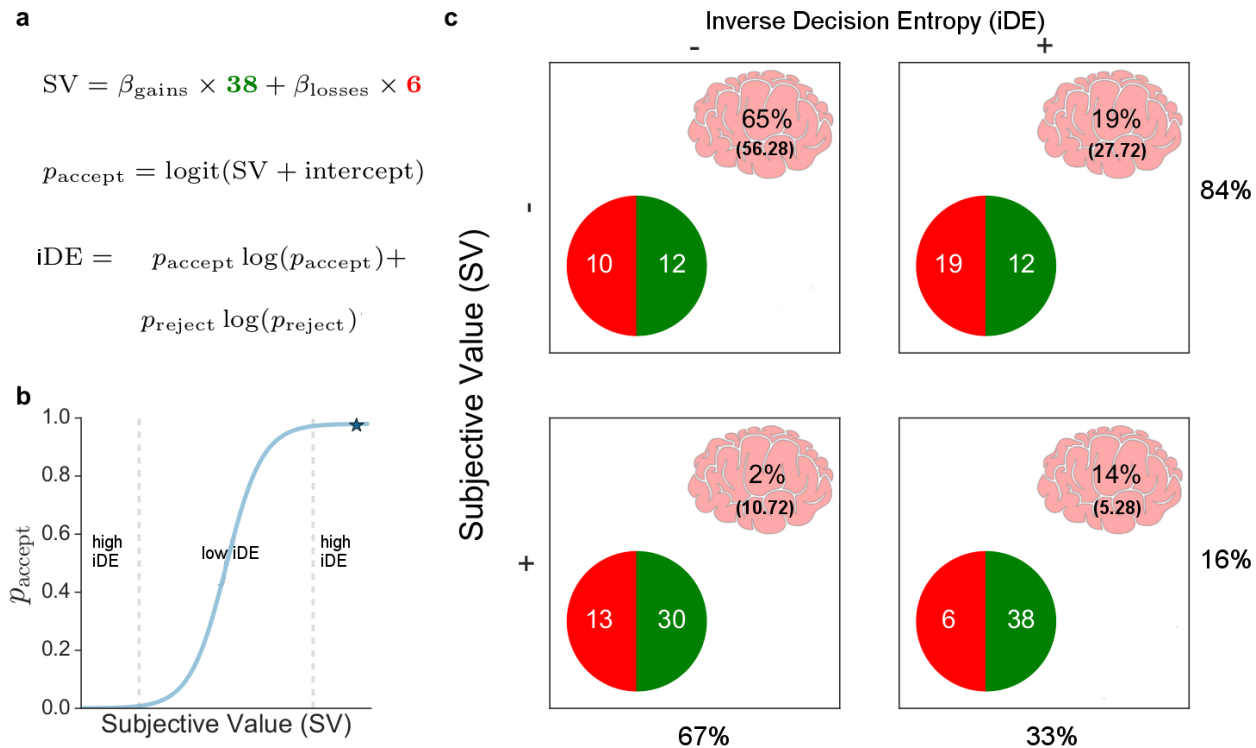

Figure 1: Behavioral analysis and voxel distribution. Three equations **a**) describe the behavioral model in which subjective value (SV) is a weighted combination of gains and losses,  $p_{\text{accept}}$  is the probability of accepting a gamble, and inverse decision entropy (iDE) is the (negative) Shannon entropy of  $p_{\text{accept}}$  and its complement  $p_{\text{reject}}$ . **b**)  $p_{\text{accept}}$  is a function of SV. High values of iDE arise from extreme values of SV, whereas iDE is low for middling values of SV in which  $p_{\text{accept}}$  is close to 0.5. **c**) The 2x2 table shows all positive and negative combinations of SV and iDE. In each cell, the percentage of voxels (whole brain) that show that specific combination of SV and iDE effects is shown along with the expected percentage in parantheses according to the null hypothesis that SV value and iDE are independent. The results indicate SV and iDE tend to both be either positive or negative. The marginals for the rows and columns are also shown.

To foreshadow our results, these predictions were confirmed. We observed a smooth map (on the medial surface of PFC) that tracked both value and iDE (i.e., confidence) in a principled way. Thus, what we find are representations geared towards action; a decision map that is smoothly activated from low confidence (low iDE) and low value in dorsomedial prefrontal cortex (dmPFC) to high value and high confidence (high iDE) in vmPFC. We also found that positive/positive and negative/negative relationship between value and confidence held in voxels throughout the brain.

To specify this neural link between decision entropy and subjective value, we used fMRI data from the Neuroimaging Analysis Replication and Prediction Study (NARPS; Botvinik-Nezer, Iwanir, et al., 2019; Botvinik-Nezer, Holzmeister, et al., 2019). With a considerably large sample size ( $N = 104$ , after exclusion), we tested the different contributions of subjective value and decision entropy to the blood oxygen level dependent (BOLD) signal. Sample sizes as large as these are uncommon for neuroeconomic experiments, which makes this data set well-suited to answering how value and confidence are related in the brain at large. We pitted inverse decision entropy and subjective value against each other with a focus on a whole-brain corrected analysis of three canonical value areas: nucleus accumbens (NA), vmPFC, and the amygdala. These regions of interest (ROI) were pre-selected in the original NARPS study (see Supplemental Information, SI) which focused on the analysis of gains and losses but not confidence. The task was a mixed gambling task where participants either accepted or rejected each gamble (Figure 1c).

## 2 Results

The results are based on data collected by the NARPS team (Botvinik-Nezer, Iwanir, et al., 2019; Botvinik-Nezer, Holzmeister, et al., 2019). After applying exclusion criteria (see Methods), data from 104 participants from the

mixed-gambles task were analyzed. In the scanner, they were asked to accept or reject prospects with a 50% chance of gaining or losing a certain amount of money (Figure 1c).

Decision weights for gains and losses were estimated for each participant by logistic regression on the decision to accept or reject the gamble. The logistic regression models the participants' probability,  $p_{\text{accept}}$ , of accepting a gamble on a given trial (see Figure 1a) is

$$p_{\text{accept}} = \text{logit}(\beta_{\text{gains}} \times \text{gains} + \beta_{\text{losses}} \times \text{losses} + \text{intercept}). \quad (1)$$

Using our model we computed the subjective value, which is how much a participant values the current gamble, and the inverse decision entropy, which is how certain a participant is about accepting or rejecting the current gamble. Subjective value for a specific trial was computed using the estimated beta coefficients  $\beta$  for gains ( $\beta_{\text{gains}}$ ) and losses ( $\beta_{\text{losses}}$ ) as:

$$SV = \beta_{\text{gains}} \times \text{gains} + \beta_{\text{losses}} \times \text{losses}. \quad (2)$$

From  $p_{\text{accept}}$ , we calculate decision (Shannon) entropy as

$$DE = -[p_{\text{accept}} \times \log_2(p_{\text{accept}}) + p_{\text{reject}} \times \log_2(p_{\text{reject}})], \quad (3)$$

where  $p_{\text{reject}}$  is  $1 - p_{\text{accept}}$ . Finally, inverse decision entropy (iDE) is simply negative DE.

Although simple, this model captures individual differences in both behaviour and brain response. For example, estimated behavioural loss aversion for a participant,  $\beta_{\text{losses}}/\beta_{\text{gains}}$ , tracked the ratio of negative and positive SV voxels.

Both SV and iDE, estimated from behavior, were used as parametric modulators in a general linear model (GLM) of the fMRI data. This model-based fMRI analysis answers three key questions: 1) How widespread are the effects (either positive or negative) of SV and iDE? 2) Which areas differentially respond to either iDE or SV? and 3) How do SV and iDE effects interrelate?

## 2.1 Main effects of subjective value and inverse decision entropy

The answer to the first question is shown in the left side of Figure 2. Overall, it is striking how widespread SV and iDE effects (both positive and negative) are. To foreshadow the results, although both SV and iDE signals are widespread, iDE is more pervasive. Areas that signal both SV and iDE tend to respond either positively and negatively for both measures with a positive cluster in vmPFC and a negative cluster occurring more dorsally.

Negative effects of SV and iDE were not observed in NA, amygdala or vmPFC. Though SV (purple colors, top row in Figure 2) indeed presented a strong cluster of deactivation (150923 voxels,  $p < 0.001$ ) with a peak  $Z$  statistic of 8.39 (coordinates in MNI152 space in millimeters:  $x = -44$ ,  $y = -27$ ,  $z = 61$ ) in the left postcentral gyrus. Also in Figure 2 (left column), iDE (dark pink colors) presents a cluster of negative activation in the cingulate gyrus (3438 voxels,  $p < 0.001$ , peak  $Z = 5.86$ ). However, the largest cluster of negative activation for iDE (300573 voxels,  $p < 0.001$ ) shows a peak  $Z$  statistic in the right supramarginal gyrus of 10.2 (coordinates in MNI152 space in millimeters:  $x = 50$ ,  $y = -39$ ,  $z = 53$ ). For the conjunction analysis of negative effects, the top left brain in Figure 2 (light pink colors) presents clusters with peak activation in left postcentral gyrus (25820 voxels,  $p < 0.001$ , peak  $Z = 5.76$ ) and cingulate gyrus (14195 voxels,  $p < 0.001$ , peak  $Z = 4.93$ ), among others (see SI).

As for positive effects, SV (purple colors, bottom left of Figure 2) presents a strong cluster of positive activation (17326 voxels,  $p < 0.001$ ) in the right NA with a peak  $Z$  statistic of 5.44 (coordinates in MNI152 space in millimeters:  $x = 13$ ,  $y = 15$ ,  $z = -10$ ). Notably, activation of vmPFC was strong and part of the same cluster as right NA, extending towards the frontal pole with  $Z$  statistics ranging from  $\sim 2.5$  to  $\sim 4$ . No positive activations of SV were observed in bilateral amygdala. Also in Figure 2 (dark pink colors, middle column), inverse decision entropy presents an enormous cluster of positive activation (515033 voxels,  $p < 0.001$ ) with a peak  $Z$  statistic in right vmPFC of 8.75 (coordinates in MNI152 space in millimeters:  $x = 6$ ,  $y = 56$ ,  $z = -20$ ). This cluster extends towards bilateral NA and bilateral amygdala and is bigger than any cluster of activation found for subjective value, by far. For the conjunction analysis of positive effects (Figure 2, light pink colors, middle brain in the bottom row), we found only one significant cluster with peak activation in vmPFC with activation extending into bilateral NA (14732 voxels,  $p < 0.001$ , peak  $Z = 5.02$ , coordinates in MNI152:  $x = 7$ ,  $y = 51$ ,  $z = -20$ ).

How widespread SV and iDE related activity is noteworthy. Furthermore, the alignment of negative effects (Figure 2, top left) and positive effects (Figure 2, middle column, bottom row) of both variables suggests a principled organization for a decision-oriented map in mPFC.

Accordingly, SV and iDE effects were not as widespread with positive/negative or negative/positive pairings. Indeed, we found no cluster activations for the conjunction of positive SV with negative iDE (Figure 2, light pink colors, bottom

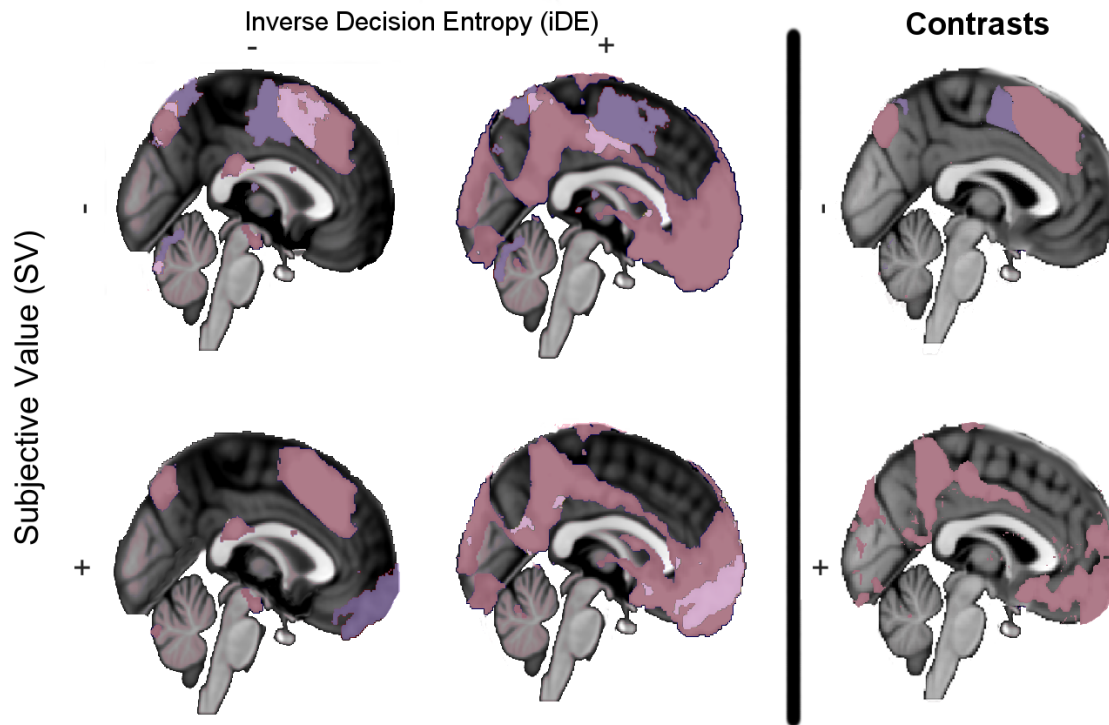

Figure 2: Main effects and contrasts in medial prefrontal cortex. Presents significant activations of subjective value (purple), inverse decision entropy (dark pink), and their conjunction (light pink) for a whole-brain corrected analysis conducted with FSL FEAT's FLAME 1 for different combinations of positive and negative main effects (2x2). The column on the right hand side (i.e., **contrasts**) shows areas with stronger negative effects (top right) or stronger positive effects (lower right).

left). However, for the conjunction of negative subjective value and positive inverse decision entropy (Figure 2, light pink colors, middle column, top row), we found clusters with peak activation in the left and right supramarginal gyrus (respectively: 15390 voxels,  $p < 0.001$ , peak  $Z = 5.06$ , and 8805 voxels,  $p < 0.001$ , peak  $Z = 4.55$ ) as well as in the left postcentral gyrus, right lateral occipital cortex (LOC), and cingulate gyrus (see SI for more details on all clusters).

## 2.2 Contrast of subjective value and inverse decision entropy

Our second question about preferential coding of SV or iDE is answered through the direct comparison of the effects of iDE and SV (Figure 2, **contrasts** on the rightmost column). To avoid detecting stronger effects of one variable due to negative effects of the other, we performed a conjunction analysis of main effects with each contrast (see Methods). The main result is that iDE effects, both positive and negative, were stronger even in purported value areas.

As seen on the right hand side of Figure 2 (**contrasts**, bottom right), iDE has a larger overall **positive** effect when compared to SV. In accordance with the biggest iDE cluster observed in Figure 2 (middle column), here we observe a cluster of 311318 voxels ( $p < 0.001$ ) with a mean  $Z$  statistic of 3.2. Both vmPFC and bilateral amygdala are part of this cluster with  $Z$  statistics close to the mean effect (within a tolerance of plus  $\sim 0.3$  or minus  $\sim 0.7$ ). For cerebral clusters where iDE shows a stronger **negative** effect than SV (Figure 2, top right), these include: left and right frontal pole (respectively: 154059 voxels,  $p < 0.001$ , peak  $Z = 3.54$ , and 106855 voxels,  $p < 0.001$ , peak  $Z = 3.54$ ), left and right LOC (respectively: 7920 voxels,  $p < 0.001$ , peak  $Z = 3.54$ , and 10039 voxels,  $p < 0.001$ , peak  $Z = 3.54$ ). The results did not show any clusters where SV had a significantly larger **positive** effect than iDE, which is striking for purported value areas. On the other hand, by far the biggest cluster where SV had a stronger **negative** effect than iDE (Figure 2, top right) displays peak activation in the left cingulate gyrus (29900 voxels,  $p < 0.001$ , peak  $Z = 3.54$ ). The low variance in the peak  $Z$  statistics reported in this section is due to the nature of the test (see Methods).

To summarize these results, iDE had a stronger effect in the amygdala bilaterally and vmPFC. No significant difference between sSV and iDE was found in either left or right NA. Indeed, the contrast plots (Figure 2, rightmost column) show



that many traditional value areas are more responsive to entropy. More details on all clusters contrasting SV and iDE can be found in the SI.

### 2.3 Interdependence of subjective value and inverse decision entropy

Our final question concerns the relationship between SV and iDE. We predicted that these quantities would be intertwined in a particular way, namely that SV and iDE would collocate and match in terms of positivity and negativity. We confirmed these predictions in three ways.

First, in Figure 1c, we present the different contingencies for the intersection of voxels where both variables have an effect in the whole brain (masked with task-active voxels),  $\chi^2 = 25.59, p < 0.001$ . This analysis shows that voxels tend to either be both positive for SV and iDE or both negative. Figure 1c shows the expected and observed cell frequencies underlying this analysis. One observation is that there is also a strong effect for voxels to code negative values for both iDE and SV, which might relate to risk aversion (see SI). The relationship between iDE and SV was even stronger in three regions of interest (right NA, right amygdala, and frontal medial cortex - which includes vmPFC). Right NA had a 98% overlap of positive SV and iDE, whereas frontal medial cortex and right amygdala had 100% overlap.

Second, rather than dichotomise the data, we present the correlations of beta weights between SV and iDE for these same areas (Figure 3). Frontal medial cortex shows the strongest correlation for these variables (Figure 3e),  $r = 0.823, p < 0.001$ , and that the correlation remains positive at the whole brain level (Figure 3f),  $r = 0.379, p < 0.001$ . Both left NA (Figure 3a),  $r = 0.506, p < 0.001$ , and right NA (Figure 3b),  $r = 0.488, p < 0.001$ , show strong correlations between SV and iDE as well, followed by the right amygdala (Figure 3d),  $r = 0.281, p < 0.001$ . The left amygdala (Figure 3c) also shows an association but the effect is relatively small when compared to the other regions,  $r = 0.141, p < 0.001$ . The generalized interdependence between SV and iDE further supports the notion of a principled alignment between both measures.

Third, there appear to be relatively smooth maps that span large regions that are either positive or negative for both SV and iDE. For illustrative purposes, we present the beta weights (z-scored independently) for both variables viewed from a sagittal perspective of the medial cortex (Figure 4). Notice that the areas that are positive or negative for SV (Figure 4a) and iDE (Figure 4b) tend to overlap such that the summation (Figure 4c) reveals relatively smooth and uniform gradients of positivity and negativity for both SV and iDE.

## 3 Discussion

The large-scale dataset from the NARPS team afforded us the opportunity to clarify the relationship between subjective value (SV) and a quantity related to confidence, inverse decision entropy (iDE). Previous work by Lebreton et al. (2015) suggested that value and confidence combine into a single quantity such that confidence effectively adds to a basic value signal to yield a combined signal. This view is supported by data and is intuitive in that being confident in an option should make it more attractive. In addition to the metacognitive roles confidence can play (Fleming & Daw, 2017; Yeung & Summerfield, 2012) in decision making, a combined signal provides an avenue for confidence to directly impact the immediate choice. Although appealing, this view seems incomplete in that it neglects situations in which confidence is low.

We evaluated the possibility that the brain organises value and confidence representations in a systematic fashion that reflects the overall desirability of choice options. This view holds that regions that respond positively to increases in value should also respond positively to increases in confidence. Conversely, there should also be regions that respond negatively to both value and confidence. If the brain represents options in terms of a general notion of desirability that combines value and confidence signals, signals reflecting purely positive and purely negative pairings should be more prevalent than mixed pairings of SV and iDE.

Our view was overwhelmingly supported by the data. As shown in Figure 2, regions that coded for both SV and iDE tended to code both quantities either positively (e.g., vmPFC) or negatively (e.g., dmPFC). Across the whole brain at the individual voxel level (Figure 1c), voxels were over-represented that responded positively or negatively to both iDE and SV. This pattern was almost perfectly followed in purported value areas, such as right NA, right amygdala, and frontal medial cortex. Likewise, across voxels, beta weights for SV and iDE positively correlated across the whole brain and in purported value areas, particularly in frontal medial cortex (Figure 3e).

The organisation of positive and negative SV and iDE spans regions. There appeared to be large, smooth maps in the brain that transition from positive SV and iDE to negative SV and iDE (Figure 4). Traditional value areas, such as vmPFC, exhibit the positive pairing whereas more dorsal areas display the negative pairing of SV and iDE. In effect, these results complete the satisfying story begun by Lebreton and colleagues Lebreton et al. (2015).

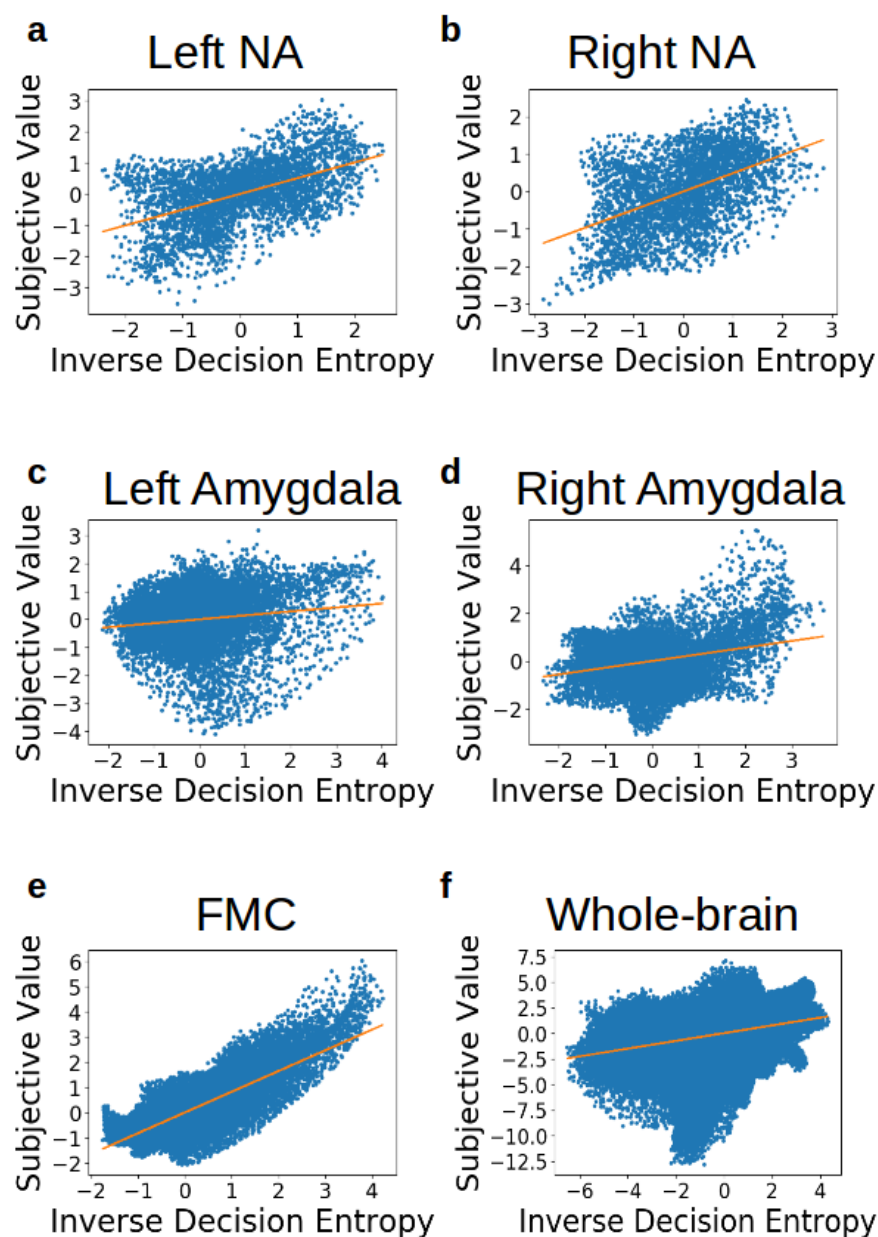

Figure 3: Links between subjective value (SV) and inverse decision entropy (iDE) across Regions of Interest (ROI). SV and iDE positively correlate across voxels (**a**) left NA, **b**) right NA, **c**) left amygdala, **d**) right amygdala, **e**) frontal medial cortex (FMC)) or for **f**) task-active voxels across the whole brain.

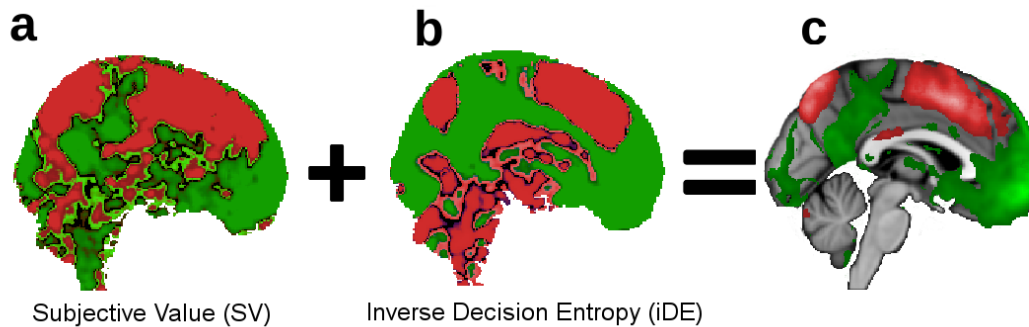

Figure 4: Beta weights for subjective value and inverse decision entropy. For illustration purposes only, we show the gradients that go from dorsal (negative effects in red) to ventral (positive effects in green) in medial prefrontal cortex for **a**) subjective value, **b**) inverse decision entropy, and **c**) summation of inverse decision entropy and subjective value (after z-scoring each variable). Colorless areas in **c**) represent brain areas where the effects cancel each other out (i.e., close to zero). Lighter areas in **c**) represent larger absolute values.

Our model-based analyses suggests a reinterpretation of purported value areas. Although it was known that confidence signals can appear in purported value areas (De Martino et al., 2013), our results indicate that these confidence signals are stronger and more pervasive in these areas than value signals. This result is striking because these areas were selected because they are understood to be value areas.

When comparing positive main effects, the biggest inverse decision entropy cluster (Figure 2, middle column, dark pink colors) is more than seventeen times the size of the biggest subjective value cluster (Figure 2, bottom left, purple colors) and more than ten times the size of all subjective value clusters combined. Similarly, when directly comparing the effects of inverse decision entropy and subjective value (Figure 2, rightmost column), the biggest cluster is the one where inverse decision entropy is larger than subjective value — when comparing their positive effects (bottom right of Figure 2). Such a cluster is also bigger than all the clusters where subjective value is larger than inverse decision entropy combined.

One suggestion is that these areas should no longer be referred to as value areas given they are more strongly driven by uncertainty (e.g., iDE) when making risky decisions. Indeed, in this task, there is no strong evidence of pure value signals. Of course, even though these areas are strongly driven by iDE, it would also be incorrect to refer to these areas as uncertainty areas given the intertwined and highly non-accidental relationship between SV and iDE signals. Instead, it appears that decision areas reflect a combined signal that is topographically organised from jointly positive to jointly negative measures.

One question is why the brain might organise SV and iDE information in this jointly positive or jointly negative manner. One explanation is that this representation of choice options is easily tied to action. Such an axis is consistent with valence-dependent confidence (Lebreton et al., 2019) and with theories on approach-avoidance being the primary dimension along which behavior is expressed (Cain & LeDoux, 2008; Elliot & Church, 1997; Hull, 1952; Vroom, 1964). Evaluating uncertainty negatively is consistent with studies of risk aversion both in humans (Huettel et al., 2006) and non-human primates (Hayden & Platt, 2007; Kacelnik & Bateson, 1996). Thus, our account suggests that confidence and value are integral computations directed towards action.

Our results support a research strategy of considering how different measures, in this case SV and iDE, relate as opposed to localising single measures. By considering multiple measures and regions, a clear picture emerges of how the brain organises SV and iDE signals, which in turn suggests how this information may be used to support decision making.

Another general lesson is that model-based fMRI analyses of individual participants is feasible and useful. The model we used was incredibly simple, yet provided the means to understand how SV and iDE signals related. Furthermore, fits to individuals' behaviour yielded measures of risk aversion that reflect individual differences in brain response (see SI). In effect, the cognitive model is demonstrating a reality at both the behavioral and neural level for individual participants, which mirrors recent findings in the concept learning literature on attentional shifts (Braunlich & Love, 2018; Mack et al., 2020). Our results support the claim that cognitive models can reveal intricate facets of behaviour and brain response.



## 4 Methods

### 4.1 Overview

Our analyses were based on data from the Neuroimaging Analysis Replication and Prediction Study (NARPS; Botvinik-Nezer, Iwanir, et al., 2019; Botvinik-Nezer, Holzmeister, et al., 2019). Data from 108 participants (60 female, 48 male; mean age = 25.5 years, s.d. = 3.59) were made available to participating teams. Participants engaged in a mixed-gambles task in an fMRI scanner (four runs). They were asked to either accept or reject gambles based on a 50/50 chance of incurring in a certain amount of monetary gain or loss; where losses and gains were orthogonal to each other. Originally, the available responses were strongly accept, weakly accept, weakly reject, and strongly reject, but these were collapsed into accept and reject categories for our modelling purposes.

Participants were assigned to one of two conditions; an equal range condition and an equal indifference condition. Participants in the equal range condition observed an equal range of potential losses and gains as in De Martino et al. (2010). Participants in the equal indifference condition observed a potential range of losses that was half that of potential gains as in Tom et al. (2007), consistent with previous estimates of loss aversion (see Supplemental Information, SI, for full experimental protocol details). Our study did not focus on differences between ranges of gains or losses, thus participants from both conditions were collapsed into a single group. Some participants were previously excluded by the NARPS organizers. We further excluded four participants: one participant had too much head movement (above 2.3 standard deviations above group mean in framewise displacement), one participant reversed the response button mapping, and another two participants were above 2.3 standard deviations from the group mean in either their gain or loss coefficients from our model (see subsection 4.3). Thus, 104 participants were included in the final analyses.

### 4.2 MRI scanning protocols and fMRI preprocessing

MRI was performed on a 3T Siemens Prisma scanner at Tel Aviv University. The data were preprocessed by the NARPS organizers using *fMRIPrep* 1.1.6 (Esteban, Markiewicz, et al., 2018, RRID:SCR\_016216); (Esteban, Blair, et al., 2018), which is based on *Nipype* 1.1.2 (Gorgolewski et al., 2011); (Gorgolewski et al., 2018, RRID:SCR\_002502). Brain extraction was performed using the brain mask output from *fMRIPrep* v1.1.6. (see SI for more information as well as the information on the NARPS dataset: Botvinik-Nezer, Iwanir, et al., 2019; Botvinik-Nezer, Holzmeister, et al., 2019).

### 4.3 Model-based fMRI

We used subjective value and inverse decision entropy as parametric modulators for the general linear model (GLM) of the fMRI data, along with an intercept. This model included temporal derivatives for the mentioned variables and seven movement nuisance regressors (framewise displacement and rotations and translations along the X, Y, and Z coordinates). The nuisance regressors were all provided as output from *fMRIPrep* v1.1.6.

Variables in the fMRI GLM were modelled with a double-gamma as a basis function and the full trial duration of four seconds with FSL 5.0.9 (Jenkinson et al., 2012). No orthogonalization was forced between regressors. We used a spatial smoothing kernel of 5mm FWHM and FSL's default highpass filter with 100 seconds cutoff (i.e., locally linear detrending of data and regressors). We also used FSL's default settings for the locally regularized autocorrelation function. The four runs per subject were pooled with fixed effects at the second level and modelled with FSL FEAT's "FLAME 1" with outlier deweighting at the third level.

For inference on the main effects of subjective value and inverse decision entropy, we ran whole-brain corrected analyses with FSL's default thresholds for cluster-wise inference of  $z = 2.3$  and  $p = 0.05$ . We looked at both positive and negative activations. To declare activation, or its absence thereof, we took the left and right amygdala, the left and right nucleus accumbens, and the frontal medial cortex masks from the Harvard-Oxford cortical and subcortical atlases provided within FSL. The images were resampled and binarized using FSL's *flirt* with a threshold of 50%. A custom bash script checked if active voxels were found in these areas as well as doing a visual inspection of the thresholded  $z$  maps in the regions of interest.

The Results section focused on four different analyses: 1) the negative main effects of subjective value and inverse decision entropy, 2) the positive main effects of subjective value and inverse decision entropy, 3) the direct comparison of effects between these two variables, and 4) the correlation between subjective value and inverse decision entropy across voxels in the brain. For both negative and positive effects, we also reported the results of a conjunction analysis (Nichols et al., 2005) which specifies regions where both variables are significantly below zero (for negative effects, top row in Figure 2) or above zero (for positive effects, bottom row in Figure 2). This conjunction analysis was performed as described in (Nichols et al., 2005) using Tom Nichol's *easythresh\_conj.sh* script (Nichols, 2019). The third analysis

was performed as two one sample  $t$ -tests with FSL *randomise* (5000 permutations,  $p < 0.01$ ) on the signed differences (i.e., both inverse decision entropy minus subjective value and subjective value minus inverse decision entropy) between the  $Z$  statistics estimated at the second level GLM after pooling estimates with a fixed effects model across the four runs. To account for the fact that a variable can show a larger effect simply because the other variable shows a strong negative effect, we used the conjunction of the contrasts with the corresponding main effects (of either subjective value or inverse decision entropy, respectively). To facilitate these conjunctions, we converted the  $p$ -values from the mentioned FSL *randomise* analysis to  $Z$  statistics and further masked the output based on voxels that showed differences in absolute value. Alternatively, testing for differences between absolute values of these variables can be checked in the SI. We also report the number of voxels in our cluster activations to emphasize their relative size sampled from MNI152 space at a resolution of 1mm x 1mm x 1mm. The fourth analysis focuses on the beta weights - as opposed to the  $Z$  statistics - to compute correlations between SV and iDE across voxels.

#### 4.4 Data and code availability

- 1) The original NARPS data can be found at: <https://openneuro.org/datasets/ds001734/versions/1.0.4>
- 2) The code for our main analyses is at: [https://github.com/bobaseb/neural\\_link\\_SV\\_iDE](https://github.com/bobaseb/neural_link_SV_iDE)

## References

- Bahrami, B., Olsen, K., Bang, D., Roepstorff, A., Rees, G., & Frith, C. (2012). What failure in collective decision-making tells us about metacognition. *Philosophical Transactions of the Royal Society B: Biological Sciences*, 367(1594), 1350–1365.
- Bang, D., Fusaroli, R., Tylén, K., Olsen, K., Latham, P. E., Lau, J. Y. F., ... Bahrami, B. (2014). Does interaction matter? Testing whether a confidence heuristic can replace interaction in collective decision-making. *Consciousness and cognition*, 26, 13–23.
- Barron, H. C., Garvert, M. M., & Behrens, T. E. J. (2015). Reassessing VMPFC: Full of confidence? *Nature Neuroscience*, 18(8), 1064–1066. Retrieved from <http://dx.doi.org/10.1038/nn.4076> doi: 10.1038/nn.4076
- Bartra, O., McGuire, J. T., & Kable, J. W. (2013). The valuation system: A coordinate-based meta-analysis of BOLD fMRI experiments examining neural correlates of subjective value. *NeuroImage*, 76, 412–427. Retrieved from <http://dx.doi.org/10.1016/j.neuroimage.2013.02.063> doi: 10.1016/j.neuroimage.2013.02.063
- Basten, U., Biele, G., Heekeren, H. R., & Fiebach, C. J. (2010). How the brain integrates costs and benefits during decision making. *Proceedings of the National Academy of Sciences*, 107(50), 21767–21772.
- Behrens, T. E. J., Hunt, L. T., Woolrich, M. W., & Rushworth, M. F. S. (2008). Associative learning of social value. *Nature*, 456(7219), 245–249. doi: 10.1038/nature07538
- Boorman, E. D., Behrens, T. E. J., Woolrich, M. W., & Rushworth, M. F. S. (2009). How green is the grass on the other side? Frontopolar cortex and the evidence in favor of alternative courses of action. *Neuron*, 62(5), 733–743.
- Botvinik-Nezer, R., Holzmeister, F., Camerer, C. F., Dreber, A., Huber, J., Johannesson, M., ... Schonberg, T. (2019). Variability in the analysis of a single neuroimaging dataset by many teams. *bioRxiv*. Retrieved from <https://www.biorxiv.org/content/early/2019/11/15/843193> doi: 10.1101/843193
- Botvinik-Nezer, R., Iwanir, R., Holzmeister, F., Huber, J., Johannesson, M., Kirchler, M., ... Schonberg, T. (2019). fMRI data of mixed gambles from the Neuroimaging Analysis Replication and Prediction Study. *Scientific Data*, 6(1), 106. Retrieved from <https://doi.org/10.1038/s41597-019-0113-7> doi: 10.1038/s41597-019-0113-7
- Braunlich, K., & Love, B. C. (2018). Occipitotemporal Representations Reflect Individual Differences in Conceptual Knowledge. *Journal of Experimental Psychology: General*, 148(7), 1192–1203.
- Bromberg-Martin, E. S., & Hikosaka, O. (2009). Midbrain dopamine neurons signal preference for advance information about upcoming rewards. *Neuron*, 63(1), 119–126.
- Cain, C. K., & LeDoux, J. E. (2008). Emotional processing and motivation: in search of brain mechanisms. *Handbook of approach and avoidance motivation*, 17–34.
- Camerer, C., Loewenstein, G., & Prelec, D. (2005). Neuroeconomics: How neuroscience can inform economics. *Journal of economic Literature*, 43(1), 9–64.
- Charpentier, C. J., Bromberg-Martin, E. S., & Sharot, T. (2018). Valuation of knowledge and ignorance in mesolimbic reward circuitry. *Proceedings of the National Academy of Sciences*, 115(31), E7255–E7264.
- De Martino, B., Bobadilla-Suarez, S., Nouguchi, T., Sharot, T., & Love, B. C. (2017). Social information is integrated into value and confidence judgments according to its reliability. *Journal of Neuroscience*, 37(25), 6066–6074.

- De Martino, B., Camerer, C. F., & Adolphs, R. (2010). Amygdala damage eliminates monetary loss aversion. *Proceedings of the National Academy of Sciences*, 107(8), 3788–3792.
- De Martino, B., Fleming, S. M., Garrett, N., & Dolan, R. J. (2013). Confidence in value-based choice. *Nature Neuroscience*, 16(1), 105–110. doi: 10.1038/nn.3279
- Domenech, P., Redouté, J., Koechlin, E., & Dreher, J.-C. (2017). The neuro-computational architecture of value-based selection in the human brain. *Cerebral Cortex*, 28(2), 585–601.
- Duverno, S., & Koechlin, E. (2017). Rewards and cognitive control in the human prefrontal cortex. *Cerebral Cortex*, 27(10), 5024–5039.
- Elliot, A. J., & Church, M. A. (1997). A hierarchical model of approach and avoidance achievement motivation. *Journal of personality and social psychology*, 72(1), 218.
- Esteban, O., Blair, R., Markiewicz, C. J., Berleant, S. L., Moodie, C., Ma, F., ... Gorgolewski, K. (2018). fmriprep. *Software*. doi: 10.5281/zenodo.852659
- Esteban, O., Markiewicz, C., Blair, R. W., Moodie, C., Isik, A. I., Erramuzpe Aliaga, A., ... Gorgolewski, K. (2018). fMRIPrep: a robust preprocessing pipeline for functional MRI. *Nature Methods*. doi: 10.1038/s41592-018-0235-4
- FitzGerald, T. H. B., Seymour, B., & Dolan, R. J. (2009). The role of human orbitofrontal cortex in value comparison for incommensurable objects. *Journal of Neuroscience*, 29(26), 8388–8395.
- Fleming, S. M., & Daw, N. D. (2017). Self-evaluation of decision-making: A general Bayesian framework for metacognitive computation. *Psychological review*, 124(1), 91.
- Fleming, S. M., Huijgen, J., & Dolan, R. J. (2012). Prefrontal contributions to metacognition in perceptual decision making. *Journal of Neuroscience*, 32(18), 6117–6125.
- Folke, T., Jacobsen, C., Fleming, S. M., & De Martino, B. (2017). Explicit representation of confidence informs future value-based decisions. *Nature Human Behaviour*, 1(1), 2.
- Glimcher, P. W. (2008). Neuroeconomics. *Scholarpedia*, 3(10), 1759.
- Gorgolewski, K., Burns, C. D., Madison, C., Clark, D., Halchenko, Y. O., Waskom, M. L., & Ghosh, S. (2011). Nipype: a flexible, lightweight and extensible neuroimaging data processing framework in python. *Frontiers in Neuroinformatics*, 5, 13. doi: 10.3389/fninf.2011.00013
- Gorgolewski, K., Esteban, O., Markiewicz, C. J., Ziegler, E., Ellis, D. G., Notter, M. P., ... Ghosh, S. (2018). Nipype. *Software*. doi: 10.5281/zenodo.596855
- Gottlieb, J., & Oudeyer, P.-Y. (2018). Towards a neuroscience of active sampling and curiosity. *Nature Reviews Neuroscience*, 1.
- Hayden, B. Y., & Platt, M. L. (2007). Temporal discounting predicts risk sensitivity in rhesus macaques. *Current Biology*, 17(1), 49–53.
- Huettel, S. A., Stowe, C. J., Gordon, E. M., Warner, B. T., & Platt, M. L. (2006). Neural signatures of economic preferences for risk and ambiguity. *Neuron*, 49(5), 765–775.
- Hull, C. L. (1952). *A behavior system; an introduction to behavior theory concerning the individual organism*. Yale University Press.
- Hunt, L. T., Kolling, N., Soltani, A., Woolrich, M. W., Rushworth, M. F. S., & Behrens, T. E. J. (2012, 1). Mechanisms underlying cortical activity during value-guided choice. *Nature Neuroscience*, 15, 470. Retrieved from <https://doi.org/10.1038/nn.3017><http://10.0.4.14/nn.3017><https://www.nature.com/articles/nn.3017#supplementary-information>
- Jenkinson, M., Beckmann, C. F., Behrens, T. E. J., Woolrich, M. W., & Smith, S. M. (2012). Fsl. *Neuroimage*, 62(2), 782–790.
- Kacelnik, A., & Bateson, M. (1996). Risky theories—the effects of variance on foraging decisions. *American Zoologist*, 36(4), 402–434.
- Kepecs, A., Uchida, N., Zariwala, H. A., & Mainen, Z. F. (2008). Neural correlates, computation and behavioural impact of decision confidence. *Nature*, 455(7210), 227.
- Kiani, R., Corthell, L., & Shadlen, M. N. (2014). Choice certainty is informed by both evidence and decision time. *Neuron*, 84(6), 1329–1342.
- Lau, H., & Rosenthal, D. (2011). Empirical support for higher-order theories of conscious awareness. *Trends in cognitive sciences*, 15(8), 365–373.

- Lebreton, M., Abitbol, R., Daunizeau, J., & Pessiglione, M. (2015). Automatic integration of confidence in the brain valuation signal. *Nature Neuroscience*, 18(8), 1159–1167. doi: 10.1038/nn.4064
- Lebreton, M., Baci, K., Palminteri, S., & Engelmann, J. B. (2019). Contextual influence on confidence judgments in human reinforcement learning. *PLoS computational biology*, 15(4), e1006973.
- Levy, D. J., & Glimcher, P. W. (2012). The root of all value: A neural common currency for choice. *Current Opinion in Neurobiology*, 22(6), 1027–1038. Retrieved from <http://dx.doi.org/10.1016/j.conb.2012.06.001> doi: 10.1016/j.conb.2012.06.001
- Mack, M. L., Preston, A. R., & Love, B. C. (2020). Ventromedial prefrontal cortex compression during concept learning. *Nature Communications*, 11(1), 1–11.
- Meyniel, F., Sigman, M., & Mainen, Z. F. (2015). Confidence as Bayesian Probability: From Neural Origins to Behavior. *Neuron*, 88(1), 78–92. Retrieved from <http://dx.doi.org/10.1016/j.neuron.2015.09.039> doi: 10.1016/j.neuron.2015.09.039
- Nichols, T. (2019). *easythresh\_conj.sh*. [https://warwick.ac.uk/fac/sci/statistics/staff/academic-research/nichols/scripts/fsl/easythresh\\_conj.sh](https://warwick.ac.uk/fac/sci/statistics/staff/academic-research/nichols/scripts/fsl/easythresh_conj.sh). Retrieved 2019-05-02, from [https://warwick.ac.uk/fac/sci/statistics/staff/academic-research/nichols/scripts/fsl/easythresh\\_conj.sh](https://warwick.ac.uk/fac/sci/statistics/staff/academic-research/nichols/scripts/fsl/easythresh_conj.sh) (Accessed: 2019-05-02)
- Nichols, T., Brett, M., Andersson, J., Wager, T., & Poline, J.-B. (2005). Valid conjunction inference with the minimum statistic. *Neuroimage*, 25(3), 653–660.
- Padoa-Schioppa, C. (2007). Orbitofrontal cortex and the computation of economic value. *Annals of the New York Academy of Sciences*, 1121(1), 232–253.
- Padoa-Schioppa, C., & Assad, J. A. (2006). Neurons in the orbitofrontal cortex encode economic value. *Nature*, 441(7090), 223.
- Plassmann, H., O'Doherty, J., & Rangel, A. (2007). Orbitofrontal cortex encodes willingness to pay in everyday economic transactions. *Journal of neuroscience*, 27(37), 9984–9988.
- Platt, M. L., & Glimcher, P. W. (1999). Neural correlates of decision variables in parietal cortex. *Nature*, 400(6741), 233.
- Ratcliff, R., & Rouder, J. N. (1998). Modeling response times for two-choice decisions. *Psychological science*, 9(5), 347–356.
- Resulaj, A., Kiani, R., Wolpert, D. M., & Shadlen, M. N. (2009). Changes of mind in decision-making. *Nature*, 461(7261), 263.
- Rolls, E. T., Grabenhorst, F., & Deco, G. (2010). Choice, difficulty, and confidence in the brain. *Neuroimage*, 53(2), 694–706.
- Rouault, M., Drugowitsch, J., & Koechlin, E. (2019, January). Prefrontal mechanisms combining rewards and beliefs in human decision-making. *Nature Communications*, 10(1), 301. Retrieved from <https://doi.org/10.1038/s41467-018-08121-w> doi: 10.1038/s41467-018-08121-w
- Rouault, M., Seow, T., Gillan, C. M., & Fleming, S. M. (2018). Psychiatric symptom dimensions are associated with dissociable shifts in metacognition but not task performance. *Biological psychiatry*, 84(6), 443–451.
- Rushworth, M. F. S., & Behrens, T. E. J. (2008, 3). Choice, uncertainty and value in prefrontal and cingulate cortex. *Nature Neuroscience*, 11, 389. Retrieved from <https://doi.org/10.1038/nn2066> <http://10.0.4.14/nn2066>
- Sanfey, A. G., Rilling, J. K., Aronson, J. A., Nystrom, L. E., & Cohen, J. D. (2003). The neural basis of economic decision-making in the ultimatum game. *Science*, 300(5626), 1755–1758.
- Shizgal, P. (1997). Neural basis of utility estimation. *Current opinion in neurobiology*, 7(2), 198–208.
- Shizgal, P., & Conover, K. (1996). On the neural computation of utility. *Current Directions in Psychological Science*, 5(2), 37–43.
- Sugrue, L. P., Corrado, G. S., & Newsome, W. T. (2004). Matching behavior and the representation of value in the parietal cortex. *science*, 304(5678), 1782–1787.
- Tom, S. M., Fox, C. R., Trepel, C., & Poldrack, R. A. (2007). The neural basis of loss aversion in decision-making under risk. *Science*, 315(5811), 515–518.
- Usher, M., & McClelland, J. L. (2001). The time course of perceptual choice: the leaky, competing accumulator model. *Psychological review*, 108(3), 550.

Vroom, V. H. (1964). *Work and motivation*. New York: Wiley.

Yeung, N., & Summerfield, C. (2012). Metacognition in human decision-making: confidence and error monitoring. *Phil. Trans. R. Soc. B*, 367(1594), 1310–1321.
