---

# SUBJECTIVE VALUE AND DECISION ENTROPY ARE JOINTLY ENCODED BY ALIGNED GRADIENTS ACROSS THE HUMAN BRAIN

---

A PREPRINT

**Sebastian Bobadilla-Suarez\***

Department of Experimental Psychology  
University College London  
26 Bedford Way, London, WC1H 0AP  
sebastian.suarez.12@ucl.ac.uk

**Olivia Guest**

Research Centre on Interactive Media,  
Smart Systems and Emerging Technologies — RISE,  
Nicosia, Cyprus  
o.guest@rise.org.cy

Department of Experimental Psychology  
University College London  
26 Bedford Way, London, WC1H 0AP  
o.guest@ucl.ac.uk

**Bradley C. Love**

Department of Experimental Psychology  
University College London  
26 Bedford Way, London, WC1H 0AP

The Alan Turing Institute  
British Library, 96 Euston Road, London NW1 2DB  
b.love@ucl.ac.uk

August 28, 2020

## ABSTRACT

1 Recent work has considered the relationship between value and confidence in both behavior and  
2 neural representation. Here we evaluated whether the brain organizes value and confidence signals  
3 in a systematic fashion that reflects the overall desirability of options. If so, regions that respond  
4 to either increases or decreases in both value and confidence should be widespread. We strongly  
5 confirmed these predictions through a model-based fMRI analysis of a mixed gambles task that  
6 assessed subjective value (SV) and inverse decision entropy (iDE), which is related to confidence.  
7 Purported value areas more strongly signalled iDE than SV, underscoring how intertwined value  
8 and confidence are. A gradient tied to the desirability of actions transitioned from positive SV and  
9 iDE in ventromedial prefrontal cortex to negative SV and iDE in dorsal medial prefrontal cortex.  
10 This alignment of SV and iDE signals could support retrospective evaluation to guide learning and  
11 subsequent decisions.

12 **Keywords** Decision entropy · Decision making · Risk · Confidence · Subjective value · fMRI

## 13 1 Introduction

14 Subjective value (SV) and confidence are closely linked concepts. For instance, people tend to be highly confident in  
15 accepting a high-value option (e.g., their dream job). Similarly, they are confident when rejecting a low-value option  
16 (e.g., spoiled milk). For middling-values, people will be uncertain of what choice to make and confidence will be low.

---

\*corresponding author

17 Shannon entropy is a well-formulated measure of uncertainty (Shannon, 1948) that is well suited for examining  
18 confidence. So that it positively aligns with confidence, we consider the inverse of the entropy associated with a person's  
19 decision, which we refer to as inverse decision entropy (iDE). Shannon entropy characterises the uncertainty for a  
20 probability distribution in terms of the expected self-information, which can be calculated as the sum of the probability  
21 of each state times its log probability. In the case of the binary decisions considered here, the probability distribution is  
22 simply a binomial. In other words, the relationship between SV and iDE can be described by a simple mathematical  
23 function that transforms SV into the probability of accepting an option (Figure 1b; Domenech et al., 2017; Duverne &  
24 Koechlin, 2017; Lebreton et al., 2015; Rouault et al., 2019) and this probability in turn can be transformed into iDE.  
25 Although closely related conceptually, SV and iDE need not correlate (Figure 1b). Indeed, all combinations of low and  
26 high values are possible for SV and iDE (see Figure 1c).

27 Research in value-based decision making has considered measures related to confidence, such as risk, decision  
28 uncertainty, or the subjective probability of being correct (i.e., confidence, De Martino et al., 2013; Huettel et al., 2006;  
29 Lebreton et al., 2015). For example, decision confidence can be operationalized as a quadratic transform of subjective  
30 value (i.e., with an inverted-U relation to value, Domenech et al., 2017; Duverne & Koechlin, 2017; Lebreton et al.,  
31 2015; Rouault et al., 2019; Shapiro & Grafton, 2020) and a sigmoidal relation with choice probability (see Figure 1b),  
32 estimated from a cognitive model (De Martino et al., 2013; Meyniel et al., 2015; Rouault et al., 2018), or elicited as  
33 a subjective rating (Fleming et al., 2012; De Martino et al., 2013, 2017). Algorithmic proposals link confidence to  
34 evidence accumulation in value-based decision making (De Martino et al., 2013; Kepecs et al., 2008; Kiani et al., 2014);

35 One interesting question is how these value and confidence signals relate. One idea is that the evidence accumulation  
36 with respect to a value comparison process is performed in vmPFC and the confidence in this decision is explicitly  
37 represented in rostralateral PFC, enabling verbal reports of confidence (De Martino et al., 2013; Fleming et al., 2012).  
38 In line with the notion that subjective value and confidence are interlinked, confidence signals have been found more  
39 dorsally than subjective value on the medial surface of prefrontal cortex (De Martino et al., 2013, 2017; Lebreton et  
40 al., 2015). Although confidence or decision entropy can accompany subjective value computations for many of the  
41 mentioned regions (De Martino et al., 2013; Kepecs et al., 2008; Rolls et al., 2010), it is not yet clear whether areas  
42 that encode value also encode confidence and vice versa. At this juncture, rather than focusing on their localization,  
43 we suggest mapping the relationship between confidence and value throughout the brain with a focus on gradients  
44 (Margulies et al., 2016).

45 Lebreton et al. (2015) suggested that representations of value and confidence are combined into a single quantity (i.e., in  
46 vmPFC). Similarly, Gherman & Philiastides (2018) also found evidence for decision confidence signals in vmPFC but  
47 for a perceptual discrimination task. Intuitively, confidence can be seen as having value in-and-of-itself that inflates the  
48 basic value signal. Although by definition the immediate decision is driven by value, a more encompassing evaluation of  
49 a decision may involve confidence, which could shape future behaviour (Folke et al., 2017). We find this basic account  
50 appealing, but incomplete. Lebreton et al. (2015) focused on the case of positive coding of value and confidence in  
51 vmPFC. If value and confidence signals are truly intertwined, then there should also be regions that code the converse;  
52 negative coefficients for value and confidence, which is equivalent to increased activity for low confidence and negative  
53 value. Furthermore, evaluating uncertainty negatively is consistent with studies of risk aversion (Hayden & Platt, 2007;  
54 Huettel et al., 2006; Kacelnik & Bateson, 1996) and related to anxiety disorders or depression (Buhr & Dugas, 2002).

55 Moreover, one might expect cortical maps that smoothly vary, in a gradient-like manner (Guest & Love, 2017; Margulies  
56 et al., 2016), from positive options (high value, high confidence) to negative options (low value, low confidence).  
57 According to this account, the distribution of voxels across the brain that code for value and confidence will be highly  
58 non-accidental: (1) voxels that code for value should also code for confidence; and vice versa, (2) most voxels sensitive  
59 to value and confidence should either code for negative value and low confidence or positive value and high confidence.  
60 Thus, this study characterizes the joint neural coding of value and confidence on the medial surface of the human brain.

61 To foreshadow our results, these predictions were confirmed. We observed a gradient (on the medial surface of PFC)  
62 that tracked both value and iDE (i.e., confidence) in a principled way. Thus, what we find are representations geared  
63 towards evaluating actions; a decision map that is activated from low confidence (low iDE) and low value in dorsomedial  
64 prefrontal cortex (dmPFC) to high value and high confidence (high iDE) in vmPFC. We also found that positive/positive  
65 and negative/negative relationship between value and confidence held in voxels throughout the brain. The contribution  
66 of this study to decision neuroscience is twofold. First, the joint coding of value and confidence, previously proposed  
67 by Lebreton et al. (2015) for positive value and high confidence, is extended to consider the converse case and the  
68 distribution of voxels jointly coding value and confidence. Furthermore, our results suggest that medial surface activity  
69 is best described by large scale maps for decision and action related computations. Our results indicate that subjective  
70 value and confidence gradients in the brain are aligned in a manner that reflects the overall desirability of a decision,  
71 which could be useful in retrospective evaluation of a decision.

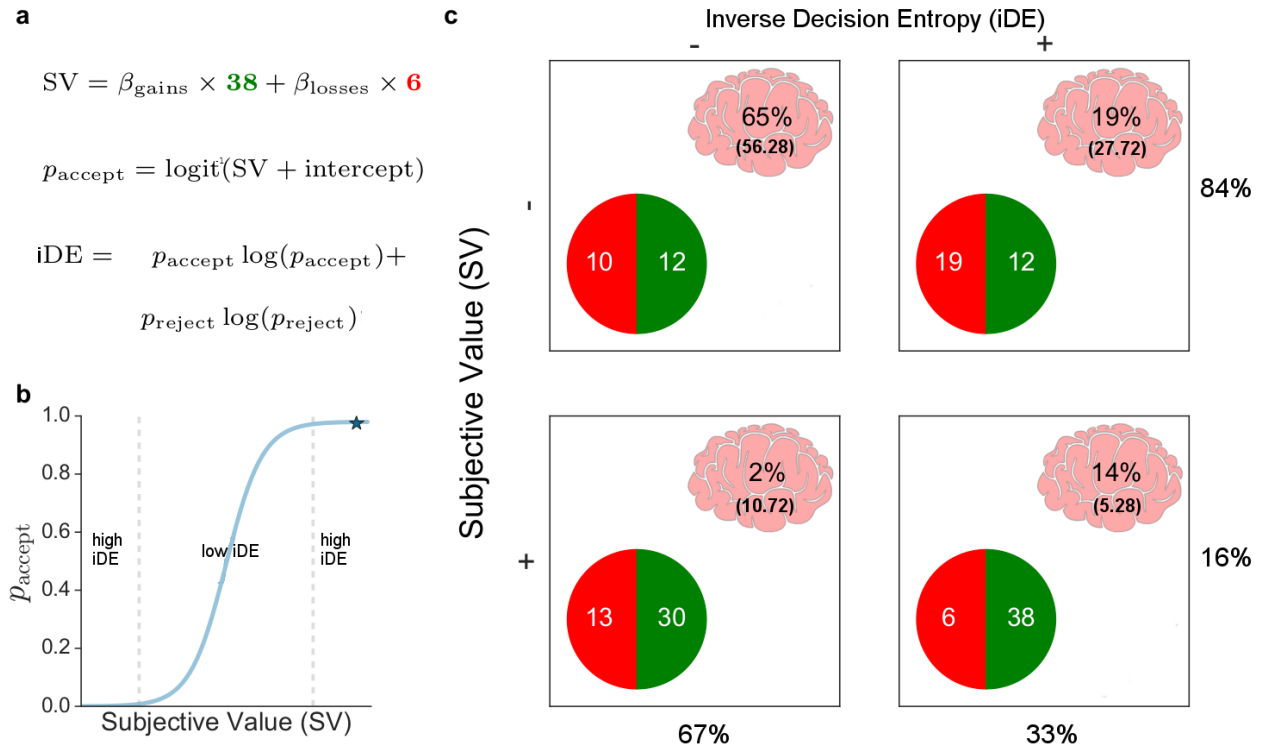

Figure 1: Behavioral analysis and voxel distribution. Three equations **a**) describe the behavioral model in which subjective value (SV) is a weighted combination of gains and losses,  $p_{\text{accept}}$  is the probability of accepting a gamble, and inverse decision entropy (iDE) is the (negative) Shannon entropy of  $p_{\text{accept}}$  and its complement  $p_{\text{reject}}$ . **b**)  $p_{\text{accept}}$  is a function of SV. High values of iDE arise from extreme values of SV, whereas iDE is low for middling values of SV in which  $p_{\text{accept}}$  is close to 0.5. **c**) The 2x2 table shows all positive and negative combinations of SV and iDE. In each cell, the percentage of voxels (whole brain) that show that specific combination of SV and iDE effects is shown along with the expected percentage in parentheses according to the null hypothesis that SV value and iDE are independent. The results indicate SV and iDE tend to both be either positive or negative. The marginals for the rows and columns are also shown. The gambles in each cell are meant to represent different combinations of high and low SV and iDE for a typical participant that presents loss aversion (e.g.,  $\beta_{\text{losses}} \approx -2\beta_{\text{gains}}$ ).

72 To specify this neural link between decision entropy and subjective value, we used fMRI data from the Neuroimaging  
 73 Analysis Replication and Prediction Study (NARPS; Botvinik-Nezer et al., 2020, 2019). With a considerably large  
 74 sample size ( $N = 104$ , after exclusion), we tested the different contributions of subjective value and decision entropy to  
 75 the blood oxygen level dependent (BOLD) signal. Sample sizes as large as these are uncommon for neuroeconomic  
 76 experiments, which makes this data set well-suited to answering how value and confidence are related in the brain  
 77 at large. We pitted inverse decision entropy and subjective value against each other with a focus on a whole-brain  
 78 corrected analysis of three canonical value areas: nucleus accumbens (NA), vmPFC, and the amygdala. These regions  
 79 of interest (ROI) were pre-selected in the original NARPS study (see Original NARPS ex-ante hypotheses in the SI)  
 80 which focused on the analysis of gains and losses but not confidence. The task was a mixed gambling task where  
 81 participants either accepted or rejected each gamble.

## 82 2 Results

83 The results are based on data collected by the NARPS team (Botvinik-Nezer et al., 2020, 2019). After applying  
 84 exclusion criteria (see Methods), data from 104 participants from the mixed-gambles task were analyzed. In the scanner,  
 85 they were asked to accept or reject prospects with a 50% chance of gaining or losing a certain amount of money.

86 Decision weights for gains and losses were estimated for each participant by logistic regression on the decision to  
 87 accept or reject the gamble. This approach models how biased a participant is when accepting or rejecting a given  
 88 gamble, based on properties of that gamble. The logistic regression models the participants' probability,  $p_{\text{accept}}$ , of  
 89 accepting a gamble on a given trial as

$$p_{\text{accept}} = \text{logit}^{-1}(\beta_{\text{gains}} \times \text{gains} + \beta_{\text{losses}} \times \text{losses} + \text{intercept}). \quad (1)$$

90 Using our model we computed the subjective value, which is how much a participant values the current gamble, and  
91 the inverse decision entropy, which is how certain a participant is about accepting or rejecting the current gamble.  
92 Subjective value for a specific trial was computed using the estimated beta coefficients  $\beta$  for gains ( $\beta_{\text{gains}}$ ) and losses  
93 ( $\beta_{\text{losses}}$ ) as

$$SV = \beta_{\text{gains}} \times \text{gains} + \beta_{\text{losses}} \times \text{losses}. \quad (2)$$

94 From  $p_{\text{accept}}$ , we calculate decision (Shannon) entropy as

$$DE = -[p_{\text{accept}} \times \log_2(p_{\text{accept}}) + p_{\text{reject}} \times \log_2(p_{\text{reject}})], \quad (3)$$

95 where  $p_{\text{reject}}$  is  $1 - p_{\text{accept}}$ . Finally, inverse decision entropy (iDE) is simply negative DE. Although simple, this model  
96 captures individual differences in both behaviour and brain response. For example, estimated behavioural loss aversion  
97 for a participant,  $\beta_{\text{losses}}/\beta_{\text{gains}}$ , tracked the ratio of negative and positive SV voxels (see Loss aversion in the brain in  
98 the Supplemental Information, SI).

99 As can be seen in Figure 2a, iDE has a quadratic relation to  $p_{\text{accept}}$  with a significant (above zero) mean Spearman  
100 correlation of 0.16 (s.d. = 0.568,  $t(103) = 2.88$ ,  $p = 0.005$ ) across participants. The density of observations for  $p_{\text{accept}}$   
101 — estimated with one thousand bins for over twenty-four thousand choices across participants — is biased towards  
102 towards the upper and lower bounds (i.e.,  $p_{\text{accept}} = 1$  and  $p_{\text{accept}} = 0$ , respectively). Likewise, iDE shares a quadratic  
103 relation with SV (see Supplementary Figure 3) presenting a significant (above zero) mean Spearman correlation of 0.16  
104 (s.d. = 0.568,  $t(103) = 2.88$ ,  $p = 0.005$ ), which follows from the high Spearman correlation between SV and  $p_{\text{accept}}$   
105 (mean = 0.99, s.d. = 0.0004, one sample  $t$ -test above zero:  $t(103) = 28687.295$ ,  $p < 0.001$ ).

106 Our iDE measure of confidence closely tracks other measures in the literature. For example, iDE positively correlates  
107 with confidence ratings provided by participants in a behavioral study ( $n = 28$ , Folke et al., 2017, see Validation of  
108 iDE in the SI) of value-based decision making with a Spearman correlation of 0.45 (s.d. = 0.171,  $t(27) = 13.61$ ,  $p <$   
109  $0.001$ ). In that study, iDE was closely related to the authors' preferred definition of confidence, namely the subjective  
110 probability of being correct (above zero mean Spearman correlation of 0.89, s.d. = 0.114,  $t(27) = 40.65$ ,  $p < 0.001$ ).  
111 This measure of confidence and iDE also tracked one another in the current study using the NARPS data (above zero  
112 mean Spearman correlation of 0.96, s.d. = 0.046,  $t(103) = 210.426$ ,  $p < 0.001$ ). These relations hold for alternative  
113 definitions of value as well (see Validation of iDE in the SI).

114 To evaluate the robustness of iDE, we considered how it varied for strongly vs. weakly accepts and rejects. Although  
115 we modeled iDE based on the accept vs. reject binary distinction, participants had four responses available to them.  
116 Even though our model fit was not informed by the strongly vs. weakly distinction, one would hope that iDE would be  
117 lower for the weakly accept and reject responses than for the strongly accept and reject responses. Indeed, as shown in  
118 Figure 2b, this relation held. The lower confidence responses (Weakly Reject and Weakly Accept) showed lower iDE  
119 (mean Weak iDE of -0.55, s.d. = 0.189) than the Strongly Accept and the Strongly Reject options (mean Strong iDE of  
120 -0.20, s.d. = 0.177, significantly higher than Weak iDE:  $t(406.61) = 19.31$ ,  $p < 0.001$ ).

121 Both SV and iDE, estimated from behavior, were used as parametric modulators in a general linear model (GLM) of the  
122 fMRI data. This model-based fMRI analysis answers three key questions: 1) How widespread are the effects (either  
123 positive or negative) of SV and iDE? 2) Which areas differentially respond to either iDE or SV? and 3) How do SV and  
124 iDE effects interrelate?

## 125 **2.1 Main effects of subjective value and inverse decision entropy**

126 The answer to the first question is shown in the left side of Figure 3. Overall, it is striking how widespread SV and iDE  
127 effects (both positive and negative) are. To foreshadow the results, although both SV and iDE signals are widespread,  
128 iDE is more pervasive. Areas that signal both SV and iDE tend to respond either positively and negatively for both  
129 measures with a positive cluster in vmPFC and a negative cluster occurring more dorsally.

130 Negative effects of SV and iDE were not observed in NA, amygdala or vmPFC. Though SV (purple colors, top row in  
131 Figure 3) indeed presented a strong cluster of deactivation (150923 voxels,  $p < 0.001$ ) with a peak  $Z$  statistic of 8.39  
132 (coordinates in MNI152 space in millimeters:  $x = -44$ ,  $y = -27$ ,  $z = 61$ ) in the left postcentral gyrus. Also in Figure  
133 3 (left column), iDE (dark pink colors) presents a cluster of negative activation in the cingulate gyrus (3438 voxels,  
134  $p < 0.001$ , peak  $Z = 5.86$ ). However, the largest cluster of negative activation for iDE (300573 voxels,  $p < 0.001$ )  
135 shows a peak  $Z$  statistic in the right supramarginal gyrus of 10.2 (coordinates in MNI152 space in millimeters:  $x = 50$ ,  $y$   
136  $= -39$ ,  $z = 53$ ). For the conjunction analysis of negative effects, the top left brain in Figure 3 (light pink colors) presents  
137 clusters with peak activation in left postcentral gyrus (25820 voxels,  $p < 0.001$ , peak  $Z = 5.76$ ) and cingulate gyrus  
138 (14195 voxels,  $p < 0.001$ , peak  $Z = 4.93$ ), among others (see Supplementary Table 1 for a list of all main effects).

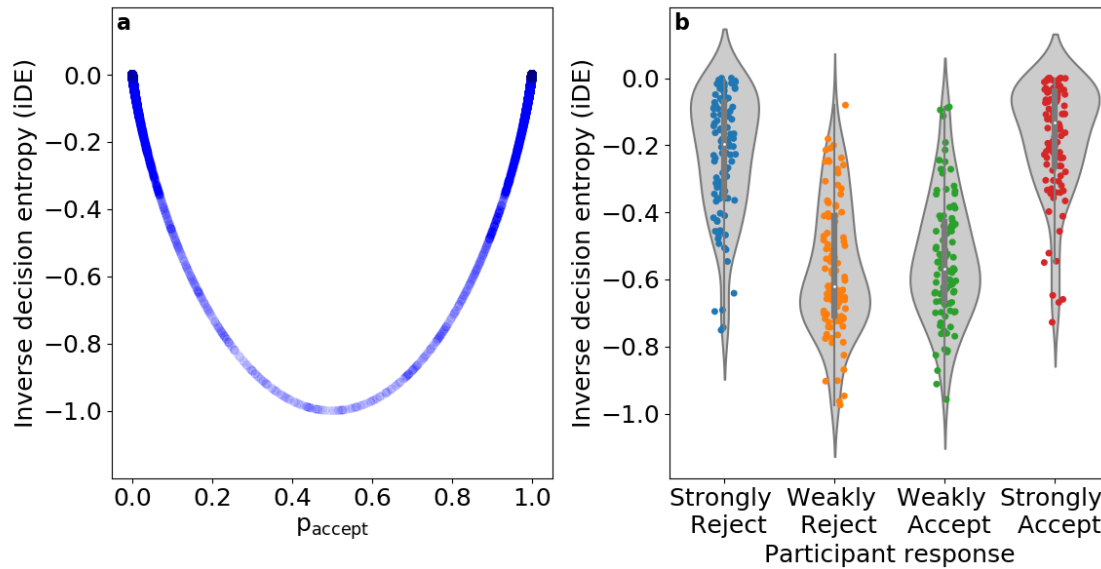

Figure 2: (a) The U-shaped relationship between  $p_{\text{accept}}$  and iDE is shown for over twenty-four thousand choices across all participants ( $N = 104$ ). Confidence is highest for low-value gambles that have a low probability of acceptance and high-value gambles that have a high probability of acceptance. The transparency in the plot reflects the density of observations in the empirical data along the  $p_{\text{accept}}$  horizontal axis. (b) A plot of iDE as a function of the four possible responses: Strongly Reject, Weakly Reject, Weakly Accept, Strongly Accept. Each dot is a participant's mean for that response type and the grey conveys the density across participants. Although our cognitive model was fit to the binary distinction of accept vs. reject, it successfully generalized by showing sensitivity to the weakly vs. strong distinction for which it was not fit.

139 As for positive effects, SV (purple colors, bottom left of Figure 3) presents a strong cluster of positive activation (17326  
140 voxels,  $p < 0.001$ ) in the right NA with a peak  $Z$  statistic of 5.44 (coordinates in MNI152 space in millimeters:  $x =$   
141  $13$ ,  $y = 15$ ,  $z = -10$ ). Notably, activation of vmPFC was strong and part of the same cluster as right NA, extending  
142 towards the frontal pole with  $Z$  statistics ranging from  $\sim 2.5$  to  $\sim 4$ . No positive activations of SV were observed in  
143 bilateral amygdala. Also in Figure 3 (dark pink colors, middle column), inverse decision entropy presents an enormous  
144 cluster of positive activation (515033 voxels,  $p < 0.001$ ) with a peak  $Z$  statistic in right vmPFC of 8.75 (coordinates in  
145 MNI152 space in millimeters:  $x = 6$ ,  $y = 56$ ,  $z = -20$ ). This cluster extends towards bilateral NA and bilateral amygdala  
146 and is bigger than any cluster of activation found for subjective value, by far. For the conjunction analysis of positive  
147 effects (Figure 3, light pink colors, middle brain in the bottom row), we found only one significant cluster with peak  
148 activation in vmPFC with activation extending into bilateral NA (14732 voxels,  $p < 0.001$ , peak  $Z = 5.02$ , coordinates  
149 in MNI152:  $x = 7$ ,  $y = 51$ ,  $z = -20$ ).

150 How widespread SV and iDE related activity is noteworthy. Furthermore, the alignment of negative effects (Figure 3,  
151 top left) and positive effects (Figure 3, middle column, bottom row) of both variables suggests a principled organization  
152 for a decision-oriented map in mPFC.

153 Accordingly, SV and iDE effects were not as widespread with positive/negative or negative/positive pairings. Indeed,  
154 we found no cluster activations for the conjunction of positive SV with negative iDE (Figure 3, light pink colors, bottom  
155 left). However, for the conjunction of negative subjective value and positive inverse decision entropy (Figure 3, light  
156 pink colors, middle column, top row), we found clusters with peak activation in the left and right supramarginal gyrus  
157 (respectively: 15390 voxels,  $p < 0.001$ , peak  $Z = 5.06$ , and 8805 voxels,  $p < 0.001$ , peak  $Z = 4.55$ ) as well as in the  
158 left postcentral gyrus, right lateral occipital cortex (LOC), and cingulate gyrus (see Supplementary Table 2 for more  
159 details on all conjunction clusters).

## 160 2.2 Contrast of subjective value and inverse decision entropy

161 Our second question about preferential coding of SV or iDE is answered through the direct comparison of the effects of  
162 iDE and SV (Figure 3, **contrasts** on the rightmost column). To avoid detecting stronger effects of one variable due to

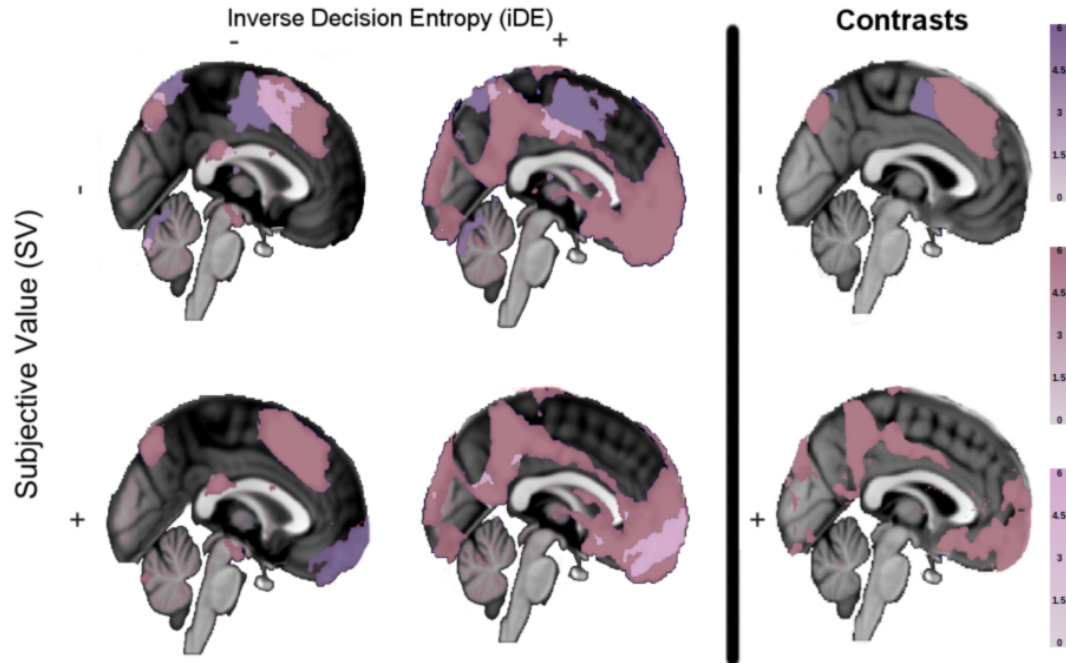

Figure 3: Main effects and contrasts in medial prefrontal cortex. The first two columns on the left present significant activations ( $Z$  statistical maps) of subjective value (purple), inverse decision entropy (dark pink), and their conjunction (light pink) for a whole-brain corrected analysis conducted with FSL FEAT's FLAME 1 for different combinations of positive and negative main effects (2x2). The column on the right hand side (i.e., **contrasts** of SV versus iDE) shows areas with stronger negative effects (top right) or stronger positive effects (lower right) of either subjective value or decision entropy.

163 negative effects of the other, we performed a conjunction analysis of main effects with each contrast (see Methods).  
164 The main result is that iDE effects, both positive and negative, were stronger even in purported value areas.

165 As seen on the right hand side of Figure 3 (**contrasts**, bottom right), iDE had a larger overall **positive** effect when  
166 compared to SV. In accordance with the biggest iDE cluster observed in Figure 3 (middle column), here we observed a  
167 cluster of 311318 voxels ( $p < 0.001$ ) with a mean  $Z$  statistic of 3.2. Both vmPFC and bilateral amygdala were part  
168 of this cluster with  $Z$  statistics close to the mean effect (within a tolerance of plus  $\sim 0.3$  or minus  $\sim 0.7$ ). For cerebral  
169 clusters where iDE showed a stronger **negative** effect than SV (Figure 3, top right), these included: left and right frontal  
170 pole (respectively: 154059 voxels,  $p < 0.001$ , peak  $Z = 3.54$ , and 106855 voxels,  $p < 0.001$ , peak  $Z = 3.54$ ), left and  
171 right LOC (respectively: 7920 voxels,  $p < 0.001$ , peak  $Z = 3.54$ , and 10039 voxels,  $p < 0.001$ , peak  $Z = 3.54$ ). The  
172 results did not show any clusters where SV had a significantly larger **positive** effect than iDE, which is striking for  
173 purported value areas. On the other hand, by far the biggest cluster where SV had a stronger **negative** effect than iDE  
174 (Figure 3, top right) displayed peak activation in the left cingulate gyrus (29900 voxels,  $p < 0.001$ , peak  $Z = 3.54$ ).  
175 The low variance in the peak  $Z$  statistics reported in this section was due to the nature of the test (see Methods).

176 To summarize these results, iDE had a stronger effect in the amygdala bilaterally and vmPFC. No significant difference  
177 between SV and iDE was found in either left or right NA. Indeed, the contrast plots (Figure 3, rightmost column) show  
178 that many traditional value areas are more responsive to entropy. More details on all clusters contrasting SV and iDE  
179 can be found in Supplementary Table 3 in the SI.

### 180 2.3 Interdependence of subjective value and inverse decision entropy

181 Our final question concerns the relationship between SV and iDE. We predicted that these quantities would be  
182 intertwined in a particular way, namely that SV and iDE would collocate and match in terms of positivity and negativity.  
183 We confirmed these predictions in three ways.

184 First, in Figure 1c, we present the different contingencies for the intersection of voxels where both variables have an  
185 effect in the whole brain (masked with task-active voxels),  $\chi^2 = 25.59$ ,  $p < 0.001$ . This analysis found that voxels tend

186 to either be both positive for SV and iDE or both negative. Figure 1c shows the expected and observed cell frequencies  
187 underlying this analysis. One observation is that there is also a strong effect for voxels to code negative values for both  
188 iDE and SV, which might relate to risk aversion. The relationship between iDE and SV was even stronger in three  
189 regions of interest (right NA, right amygdala, and frontal medial cortex - which includes vmPFC). Right NA had a 98%  
190 overlap of positive SV and iDE, whereas frontal medial cortex and right amygdala had 100% overlap.

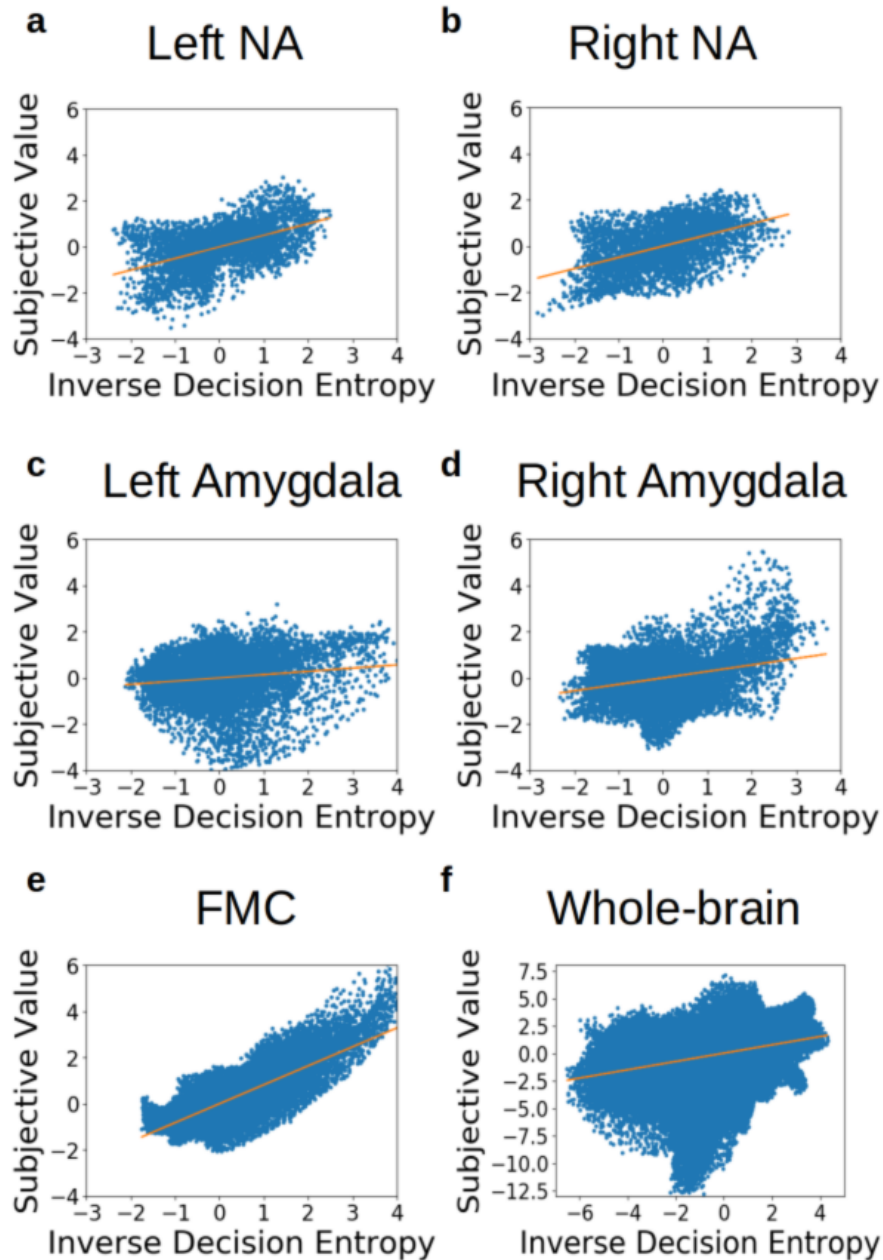

Figure 4: Links between subjective value (SV) and inverse decision entropy (iDE) across Regions of Interest (ROI). SV and iDE positively correlate across voxels (a) left NA, (b) right NA, (c) left amygdala, (d) right amygdala, (e) frontal medial cortex (FMC) or for (f) task-active voxels across the whole brain. Each dot represents beta coefficients from one voxel estimated with FSL's mixed effects model with outlier deweighting (FLAME 1).

191 Second, rather than dichotomise the data, we present the correlations of beta weights between SV and iDE for these  
192 same areas (Figure 4). Frontal medial cortex shows the strongest correlation for these variables (Figure 4e),  $r =$   
193  $0.823, p < 0.001$ , and that the correlation remains positive at the whole brain level (Figure 4f),  $r = 0.379, p < 0.001$ .  
194 Both left NA (Figure 4a),  $r = 0.506, p < 0.001$ , and right NA (Figure 4b),  $r = 0.488, p < 0.001$ , show strong

195 correlations between SV and iDE as well, followed by the right amygdala (Figure 4d),  $r = 0.281, p < 0.001$ . The left  
196 amygdala (Figure 4c) also shows an association but the effect is relatively small when compared to the other regions,  
197  $r = 0.141, p < 0.001$ . These correlations involve only two statistical maps: one of SV and one of iDE. Each map  
198 was estimated from the same GLM across all participants with FSL's mixed effects model with outlier deweighting  
199 (FLAME 1, see Methods). For example, the dots in Figure 4 represent activity in voxels of a Montreal Neurological  
200 Institute (MNI) brain template (averaged across participants, see Methods). The generalized interdependence between  
201 SV and iDE further supports the notion of a principled alignment between both measures. For completeness, we also  
202 correlated the voxelwise Z statistics (which incorporated the voxel-specific variance across subjects; see Correlations of  
203 voxelwise Z statistics between subjective value and inverse decision entropy in the SI) and found the same pattern of  
204 results with the magnitude of the correlations slightly lower.

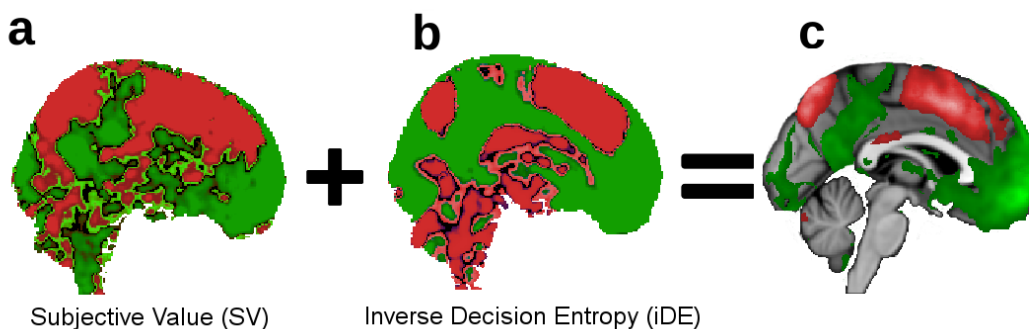

Figure 5: Beta weights for subjective value and inverse decision entropy. For illustration purposes only, we show the gradients that go from dorsal (negative effects in red) to ventral (positive effects in green) in medial prefrontal cortex for **a**) subjective value, **b**) inverse decision entropy, and **c**) summation of inverse decision entropy and subjective value (after z-scoring each variable). Colorless areas in **c**) represent brain areas where the effects cancel each other out (i.e., close to zero). Lighter areas in **c**) represent larger absolute values.

205 Third, the relation between SV and iDE formed smooth maps, as opposed to parcellations (Margulies et al., 2016), that  
206 spanned large regions that were either positive or negative for both SV and iDE. For illustrative purposes, we present the  
207 beta weights (z-scored independently) for both variables viewed from a sagittal perspective of the medial cortex (Figure  
208 5). Notice that the areas that were positive or negative for SV (Figure 5a) and iDE (Figure 5b) tended to overlap such  
209 that the summation (Figure 5c) reveals relatively uniform gradients of positivity and negativity for both SV and iDE.

### 210 3 Discussion

211 The large-scale dataset from the NARPS team afforded us the opportunity to clarify the relationship between subjective  
212 value (SV) and a quantity related to confidence, inverse decision entropy (iDE). Previous work by Lebreton et al. (2015)  
213 suggested that value and confidence combine into a single quantity such that confidence effectively adds to a basic value  
214 signal to yield a combined signal that could be used to evaluate actions. This view is supported by data and is intuitive  
215 in that being confident in an option should make it more attractive. In addition to the metacognitive roles confidence can  
216 play (Fleming & Daw, 2017; Yeung & Summerfield, 2012) in decision making, a combined signal provides an avenue  
217 for confidence to impact future choice. Although appealing, this view seems incomplete in that it neglects negative  
218 neural coding of confidence — equivalent to presenting stronger activations as confidence diminishes.

219 We evaluated the possibility that the brain organises value and confidence representations in a systematic fashion that  
220 reflects the overall desirability of choice options. This view holds that regions that respond positively to increases in  
221 value should also respond positively to increases in confidence. Conversely, there should also be regions that respond  
222 negatively to both value and confidence. If the brain represents options in terms of a general notion of desirability that  
223 combines value and confidence signals, signals reflecting purely positive and purely negative pairings should be more  
224 prevalent than mixed pairings of SV and iDE.

225 Our view was overwhelmingly supported by the data. As shown in Figure 3, regions that coded for both SV and iDE  
226 tended to code both quantities either positively (e.g., vmPFC) or negatively (e.g., dmPFC). Across the whole brain at  
227 the individual voxel level (Figure 1c), voxels were over-represented that responded positively or negatively to both iDE  
228 and SV. This pattern was almost perfectly followed in purported value areas, such as right NA, right amygdala, and  
229 frontal medial cortex. Likewise, across voxels, beta weights (and Z statistics) for SV and iDE positively correlated  
230 across the whole brain and in purported value areas, particularly in frontal medial cortex (Figure 4e).



231 The organisation of positive and negative SV and iDE spans several regions. There appeared to be large gradients in  
232 the brain that transition from positive SV and iDE to negative SV and iDE (Figure 5). Traditional value areas, such as  
233 vmPFC, exhibit the positive pairing whereas more dorsal areas display the negative pairing of SV and iDE. In effect,  
234 these results complete the satisfying story begun by Lebreton et al. (2015). The tight U-shape relation between SV and  
235 iDE is also consistent with studies relating saliency to value (Litt et al., 2011; Zhang et al., 2017), suggesting further  
236 investigation into the relationship between confidence and saliency (see Median split of SV in the SI).

237 Our model-based analyses suggests a reinterpretation of purported value areas. Although it was known that confidence  
238 signals can appear in purported value areas (De Martino et al., 2013), our results indicate that these confidence signals  
239 are stronger and more pervasive in these areas than value signals. This result is striking because these areas were  
240 selected because they are understood to be value areas.

241 One suggestion is that these areas should no longer be referred to as value areas given they are more strongly driven by  
242 uncertainty (e.g., iDE) when making risky decisions. Indeed, in this task, there is no strong evidence of pure value  
243 signals. Of course, even though these areas are strongly driven by iDE, it would also be incorrect to refer to these areas  
244 as uncertainty areas given the intertwined and highly non-accidental relationship between SV and iDE signals. Instead,  
245 it appears that decision areas reflect a combined signal that is topographically organised from jointly positive to jointly  
246 negative measures. This suggests that the human brain represents value and confidence along the same spatial axis  
247 which could support retrospective evaluation to guide learning and subsequent decisions.

248 One question is why the brain might organise SV and iDE information in this jointly positive or jointly negative manner.  
249 One explanation is that this representation of choice options is easily tied to action (Graeber, 2001; Shapiro & Grafton,  
250 2020) and is goal-dependent (Sepulveda et al., 2020). Such an axis is consistent with valence-dependent confidence  
251 (Lebreton et al., 2019) and with theories on approach-avoidance being the primary dimension along which behavior is  
252 expressed (Cain & LeDoux, 2008; Elliot & Church, 1997; Hull, 1952; Vroom, 1964). Studying the role of decision  
253 uncertainty in future actions or decisions could help illuminate this link (Akaishi et al., 2014; Folke et al., 2017). Indeed,  
254 evaluating uncertainty negatively is consistent with studies of risk aversion — both in human (Huettel et al., 2006) and  
255 non-human primates (Hayden & Platt, 2007; Kacelnik & Bateson, 1996) — as well as with intolerance of uncertainty  
256 (Buhr & Dugas, 2002). Thus, our account suggests that confidence and value are integral computations directed toward  
257 evaluating action.

258 Our results support a research strategy of considering how different measures, in this case SV and iDE, relate as opposed  
259 to localising single measures. By considering multiple measures and regions, a clear picture emerges of how the brain  
260 organises SV and iDE signals, which in turn suggests how this information may be used to support decision making.

261 This study provides a further lens on the importance of model-based fMRI analyses (for individual participants), which  
262 we believe to be more important than issues of method. The model we used was incredibly simple, yet provided the  
263 means to understand how SV and iDE signals related. Furthermore, fits to individuals' behaviour yielded measures of  
264 loss aversion that reflect individual differences in brain response (see Loss aversion in the brain in the SI). In effect, the  
265 cognitive model is demonstrating a reality at both the behavioral and neural level for individual participants, which  
266 mirrors recent findings in the concept learning literature on attentional shifts (Braunlich & Love, 2018; Mack et al.,  
267 2020). Our results support the claim that cognitive models can reveal intricate facets of behaviour and brain response.

## 268 4 Methods

### 269 4.1 Overview

270 Our analyses were based on data from the Neuroimaging Analysis Replication and Prediction Study (NARPS; Botvinik-  
271 Nezer et al., 2020, 2019). Data from 108 participants (60 female, 48 male; mean age = 25.5 years, s.d. = 3.59) were  
272 made available to participating teams. Informed consent was obtained and the original NARPS study was approved by  
273 the ethics committee at Tel Aviv University. The current study was approved by the UCL ethics committee. Participants  
274 engaged in a mixed-gambles task in an fMRI scanner (four runs). They were asked to either accept or reject gambles  
275 based on a 50/50 chance of incurring in a certain amount of monetary gain or loss; where losses and gains were  
276 orthogonal to each other. Originally, the available responses were strongly accept, weakly accept, weakly reject, and  
277 strongly reject, but these were collapsed into accept and reject categories for our modelling purposes.

278 Participants were assigned to one of two conditions; an equal range condition and an equal indifference condition.  
279 Participants in the equal range condition observed an equal range of potential losses and gains as in De Martino et  
280 al. (2010). Participants in the equal indifference condition observed a potential range of losses that was half that of  
281 potential gains as in Tom et al. (2007), consistent with previous estimates of loss aversion (see Experimental protocol  
282 and instructions (NARPS) in the SI). Our study did not focus on differences between ranges of gains or losses, thus  
283 participants from both conditions were collapsed into a single group. Some participants were previously excluded by

284 the NARPS organizers. We further excluded four participants: one participant had too much head movement (above  
285 2.3 standard deviations above group mean in framewise displacement), one participant reversed the response button  
286 mapping, and another two participants were above 2.3 standard deviations from the group mean in either their gain or  
287 loss coefficients from our model (see subsection 4.3). Thus, 104 participants were included in the final analyses. Below  
288 we summarize our fMRI preprocessing and statistical procedures.

## 289 4.2 MRI scanning protocols and fMRI preprocessing

290 MRI was performed on a 3T Siemens Prisma scanner at Tel Aviv University. The data were preprocessed by the NARPS  
291 organizers using *fMRIPrep* 1.1.6 (Esteban, Markiewicz, et al., 2018, RRID:SCR\_016216); (Esteban, Blair, et al.,  
292 2018), which is based on *Nipype* 1.1.2 (Gorgolewski et al., 2011); (Gorgolewski et al., 2018, RRID:SCR\_002502).  
293 Brain extraction was performed using the brain mask output from *fMRIPrep* v1.1.6. (see MRI scanning protocols  
294 (NARPS) and fMRI preprocessing (NARPS) in the SI for more information as well as the information on the NARPS  
295 dataset: Botvinik-Nezer et al., 2020, 2019).

## 296 4.3 Statistics and reproducibility

297 For our model-based fMRI analyses, we used subjective value and inverse decision entropy as parametric modulators  
298 for the general linear model (GLM) of the fMRI data, along with an intercept. This model included temporal derivatives  
299 for the mentioned variables and seven movement nuisance regressors (framewise displacement and rotations and  
300 translations along the X, Y, and Z coordinates). The nuisance regressors were all provided as output from *fMRIPrep*  
301 v1.1.6.

302 Variables in the fMRI GLM were modelled with a double-gamma as a basis function and the full trial duration of four  
303 seconds with FSL 5.0.9 (Jenkinson et al., 2012). No orthogonalization was forced between regressors but parametric  
304 modulators (i.e., SV and iDE) were mean-centered. We used a spatial smoothing kernel of 5mm FWHM and FSL's  
305 default highpass filter with 100 seconds cutoff (i.e., locally linear detrending of data and regressors). We also used  
306 FSL's default settings for the locally regularized autocorrelation function. The four runs per subject were pooled with  
307 fixed effects at the second level and modelled with FSL FEAT's "FLAME 1" with outlier deweighting at the third level.

308 For inference on the main effects of subjective value and inverse decision entropy, we ran whole-brain corrected  
309 analyses with FSL's default thresholds for cluster-wise inference of  $z = 2.3$  and  $p = 0.05$ . We looked at both positive  
310 and negative activations. To declare activation, or its absence thereof, we took the left and right amygdala, the left and  
311 right nucleus accumbens, and the frontal medial cortex masks from the Harvard-Oxford cortical and subcortical atlases  
312 provided within FSL. The images were resampled and binarized using FSL's *flirt* with a threshold of 50%. A custom  
313 bash script checked if active voxels were found in these areas as well as doing a visual inspection of the thresholded  $z$   
314 maps in the regions of interest. Our choices for the regions of interest (ROI) were based on the original NARPS project;  
315 to establish them as a priori decisions. The fact that regions like the nucleus accumbens (NA) or the amygdala show  
316 significant correlation between SV and iDE are worthy of notice. Our correlational strategy perhaps is more sensitive to  
317 these subtle effects (see Results).

318 The Results section focused on four different analyses: 1) the negative main effects of subjective value and inverse  
319 decision entropy, 2) the positive main effects of subjective value and inverse decision entropy, 3) the direct comparison  
320 of effects between these two variables, and 4) the correlation between subjective value and inverse decision entropy  
321 across voxels in the brain. For both negative and positive effects, we also reported the results of a conjunction analysis  
322 (Nichols et al., 2005) which specifies regions where both variables are significantly below zero (for negative effects, top  
323 row in Figure 3) or above zero (for positive effects, bottom row in Figure 3). This conjunction analysis was performed  
324 as described in (Nichols et al., 2005) using Tom Nichol's *easythresh\_conj.sh* script (Nichols, 2019).

325 The third analysis was performed as two one sample *t*-tests with FSL *randomise* (5000 permutations,  $p < 0.01$ ) on  
326 the signed differences (i.e., both inverse decision entropy minus subjective value and subjective value minus inverse  
327 decision entropy) between the  $Z$  statistics estimated at the second level GLM after pooling estimates with a fixed effects  
328 model across the four runs. We use the  $Z$  statistics to avoid spurious results based on differences in variance or range  
329 between SV and iDE. To account for the fact that a variable can show a larger effect simply because the other variable  
330 shows a strong negative effect, we used the conjunction of the contrasts with the corresponding main effects (of either  
331 subjective value or inverse decision entropy, respectively). To facilitate these conjunctions, we converted the  $p$ -values  
332 from the mentioned FSL *randomise* analysis to  $Z$  statistics and further masked the output based on voxels that showed  
333 differences in absolute value. Alternatively, testing for differences between absolute values of these variables can be  
334 checked in Supplementary Table 3 of the SI. We also report the number of voxels in our cluster activations to emphasize  
335 their relative size sampled from MNI152 space at a resolution of 1mm x 1mm x 1mm.

336 The fourth analysis focuses on the beta weights and the Z statistics (see Correlations of voxelwise Z statistics between  
337 subjective value and inverse decision entropy in the SI) to compute correlations between SV and iDE across voxels.  
338 The voxel activations were estimated across all participants with FSL's FLAME 1 mixed effects model with outlier  
339 deweighting and mapped to the MNI template. FSL's mixed effects model considers between-participant variance when  
340 estimating activations (Woolrich et al., 2004). Thus, the correlational analysis involved only two statistical maps (one  
341 for SV and one for iDE) for the statistic of interest (either beta weights or Z statistics which incorporate voxel-wise  
342 variance) and after spatial smoothing as detailed above.

#### 343 **Data availability**

344 The original NARPS data can be found at: <https://openneuro.org/datasets/ds001734/versions/1.0.4>

#### 345 **Code availability**

346 The code for our main analyses is at: [https://github.com/bobaseb/neural\\_link\\_SV\\_iDE](https://github.com/bobaseb/neural_link_SV_iDE)

#### 347 **Acknowledgments**

348 We thank Benedetto De Martino, Tyler Davis, Rob Mok and Brett Roads for comments on a previous draft of  
349 this manuscript. This work was supported by NIH Grant 1P01HD080679, Wellcome Trust Investigator Award  
350 WT106931MA, and Royal Society Wolfson Fellowship 183029 to BCL.

#### 351 **Competing interests**

352 The authors declare no competing interests, financial or otherwise.

#### 353 **Author contributions**

354 BCL developed the study concept. BCL, OG, and SBS contributed to the study design. OG and SBS performed  
355 the analysis and interpretation of the behavioral data under the supervision of BCL. SBS performed the analysis and  
356 interpretation of the fMRI data under the supervision of BCL. SBS drafted the manuscript. BCL and OG provided  
357 critical revisions. All authors approved the final version of the manuscript for submission.

#### 358 **References**

- 359 Akaishi, R., Umeda, K., Nagase, A., & Sakai, K. (2014). Autonomous mechanism of internal choice estimate underlies  
360 decision inertia. *Neuron*, *81*(1), 195–206.
- 361 Botvinik-Nezer, R., Holzmeister, F., Camerer, C. F., Dreber, A., Huber, J., Johannesson, M., ... others (2020).  
362 Variability in the analysis of a single neuroimaging dataset by many teams. *Nature*, 1–7.
- 363 Botvinik-Nezer, R., Iwanir, R., Holzmeister, F., Huber, J., Johannesson, M., Kirchler, M., ... Schonberg, T. (2019).  
364 fMRI data of mixed gambles from the Neuroimaging Analysis Replication and Prediction Study. *Scientific Data*,  
365 *6*(1), 106. doi: 10.1038/s41597-019-0113-7
- 366 Braunlich, K., & Love, B. C. (2018). Occipitotemporal Representations Reflect Individual Differences in Conceptual  
367 Knowledge. *Journal of Experimental Psychology: General*, *148*(7), 1192–1203.
- 368 Buhr, K., & Dugas, M. J. (2002). The intolerance of uncertainty scale: Psychometric properties of the English version.  
369 *Behaviour research and therapy*, *40*(8), 931–945.
- 370 Cain, C. K., & LeDoux, J. E. (2008). Emotional processing and motivation: in search of brain mechanisms. *Handbook*  
371 *of approach and avoidance motivation*, 17–34.
- 372 De Martino, B., Bobadilla-Suarez, S., Nouguchi, T., Sharot, T., & Love, B. C. (2017). Social information is integrated  
373 into value and confidence judgments according to its reliability. *Journal of Neuroscience*, *37*(25), 6066–6074.
- 374 De Martino, B., Camerer, C. F., & Adolphs, R. (2010). Amygdala damage eliminates monetary loss aversion.  
375 *Proceedings of the National Academy of Sciences*, *107*(8), 3788–3792.
- 376 De Martino, B., Fleming, S. M., Garrett, N., & Dolan, R. J. (2013). Confidence in value-based choice. *Nature*  
377 *Neuroscience*, *16*(1), 105–110. doi: 10.1038/nn.3279
- 378 Domenech, P., Redouté, J., Koechlin, E., & Dreher, J.-C. (2017). The neuro-computational architecture of value-based  
379 selection in the human brain. *Cerebral Cortex*, *28*(2), 585–601.

- 380 Duverne, S., & Koechlin, E. (2017). Rewards and cognitive control in the human prefrontal cortex. *Cerebral Cortex*,  
381 27(10), 5024–5039.
- 382 Elliot, A. J., & Church, M. A. (1997). A hierarchical model of approach and avoidance achievement motivation.  
383 *Journal of personality and social psychology*, 72(1), 218.
- 384 Esteban, O., Blair, R., Markiewicz, C. J., Berleant, S. L., Moodie, C., Ma, F., . . . Gorgolewski, K. (2018). fmriprep.  
385 *Software*. doi: 10.5281/zenodo.852659
- 386 Esteban, O., Markiewicz, C., Blair, R. W., Moodie, C., Isik, A. I., Erramuzpe Aliaga, A., . . . Gorgolewski, K. (2018).  
387 fMRIprep: a robust preprocessing pipeline for functional MRI. *Nature Methods*. doi: 10.1038/s41592-018-0235-4
- 388 Fleming, S. M., & Daw, N. D. (2017). Self-evaluation of decision-making: A general Bayesian framework for  
389 metacognitive computation. *Psychological review*, 124(1), 91.
- 390 Fleming, S. M., Huijgen, J., & Dolan, R. J. (2012). Prefrontal contributions to metacognition in perceptual decision  
391 making. *Journal of Neuroscience*, 32(18), 6117–6125.
- 392 Folke, T., Jacobsen, C., Fleming, S. M., & De Martino, B. (2017). Explicit representation of confidence informs future  
393 value-based decisions. *Nature Human Behaviour*, 1(1), 2.
- 394 Gherman, S., & Philiastides, M. G. (2018). Human VMPFC encodes early signatures of confidence in perceptual  
395 decisions. *Elife*, 7, e38293.
- 396 Gorgolewski, K., Burns, C. D., Madison, C., Clark, D., Halchenko, Y. O., Waskom, M. L., & Ghosh, S. (2011).  
397 Nipype: a flexible, lightweight and extensible neuroimaging data processing framework in python. *Frontiers in*  
398 *Neuroinformatics*, 5, 13. doi: 10.3389/fninf.2011.00013
- 399 Gorgolewski, K., Esteban, O., Markiewicz, C. J., Ziegler, E., Ellis, D. G., Notter, M. P., . . . Ghosh, S. (2018). Nipype.  
400 *Software*. doi: 10.5281/zenodo.596855
- 401 Graeber, D. (2001). *Toward an Anthropological Theory of Value: The False Coin of Our Own Dreams*. New York:  
402 Palgrave.
- 403 Guest, O., & Love, B. C. (2017). What the success of brain imaging implies about the neural code. *Elife*, 6, e21397.
- 404 Hayden, B. Y., & Platt, M. L. (2007). Temporal discounting predicts risk sensitivity in rhesus macaques. *Current*  
405 *Biology*, 17(1), 49–53.
- 406 Huettel, S. A., Stowe, C. J., Gordon, E. M., Warner, B. T., & Platt, M. L. (2006). Neural signatures of economic  
407 preferences for risk and ambiguity. *Neuron*, 49(5), 765–775.
- 408 Hull, C. L. (1952). *A behavior system; an introduction to behavior theory concerning the individual organism*. Yale  
409 University Press.
- 410 Jenkinson, M., Beckmann, C. F., Behrens, T. E. J., Woolrich, M. W., & Smith, S. M. (2012). Fsl. *Neuroimage*, 62(2),  
411 782–790.
- 412 Kacelnik, A., & Bateson, M. (1996). Risky theories—the effects of variance on foraging decisions. *American Zoologist*,  
413 36(4), 402–434.
- 414 Kepecs, A., Uchida, N., Zariwala, H. A., & Mainen, Z. F. (2008). Neural correlates, computation and behavioural  
415 impact of decision confidence. *Nature*, 455(7210), 227.
- 416 Kiani, R., Corthell, L., & Shadlen, M. N. (2014). Choice certainty is informed by both evidence and decision time.  
417 *Neuron*, 84(6), 1329–1342.
- 418 Lebreton, M., Abitbol, R., Daunizeau, J., & Pessiglione, M. (2015). Automatic integration of confidence in the brain  
419 valuation signal. *Nature Neuroscience*, 18(8), 1159–1167. doi: 10.1038/nn.4064
- 420 Lebreton, M., Baci, K., Palminteri, S., & Engelmann, J. B. (2019). Contextual influence on confidence judgments in  
421 human reinforcement learning. *PLoS computational biology*, 15(4), e1006973.
- 422 Litt, A., Plassmann, H., Shiv, B., & Rangel, A. (2011). Dissociating valuation and saliency signals during decision-  
423 making. *Cerebral cortex*, 21(1), 95–102.
- 424 Mack, M. L., Preston, A. R., & Love, B. C. (2020). Ventromedial prefrontal cortex compression during concept  
425 learning. *Nature Communications*, 11(1), 1–11.
- 426 Margulies, D. S., Ghosh, S. S., Goulas, A., Falkiewicz, M., Huntenburg, J. M., Langs, G., . . . others (2016). Situating  
427 the default-mode network along a principal gradient of macroscale cortical organization. *Proceedings of the National*  
428 *Academy of Sciences*, 113(44), 12574–12579.

- 429 Meyniel, F., Sigman, M., & Mainen, Z. F. (2015). Confidence as Bayesian Probability: From Neural Origins to  
430 Behavior. *Neuron*, 88(1), 78–92. Retrieved from <http://dx.doi.org/10.1016/j.neuron.2015.09.039> doi:  
431 10.1016/j.neuron.2015.09.039
- 432 Nichols, T. (2019). *easythresh\_conj.sh*. [https://warwick.ac.uk/fac/sci/statistics/staff/  
433 academic-research/nichols/scripts/fsl/easythresh\\_conj.sh](https://warwick.ac.uk/fac/sci/statistics/staff/academic-research/nichols/scripts/fsl/easythresh_conj.sh). Retrieved 2019-05-02, from  
434 [https://warwick.ac.uk/fac/sci/statistics/staff/academic-research/nichols/scripts/fsl/  
435 easythresh\\_conj.sh](https://warwick.ac.uk/fac/sci/statistics/staff/academic-research/nichols/scripts/fsl/easythresh_conj.sh) (Accessed: 2019-05-02)
- 436 Nichols, T., Brett, M., Andersson, J., Wager, T., & Poline, J.-B. (2005). Valid conjunction inference with the minimum  
437 statistic. *Neuroimage*, 25(3), 653–660.
- 438 Rolls, E. T., Grabenhorst, F., & Deco, G. (2010). Choice, difficulty, and confidence in the brain. *Neuroimage*, 53(2),  
439 694–706.
- 440 Rouault, M., Drugowitsch, J., & Koechlin, E. (2019, January). Prefrontal mechanisms combining rewards and beliefs  
441 in human decision-making. *Nature Communications*, 10(1), 301. Retrieved from [https://doi.org/10.1038/  
442 s41467-018-08121-w](https://doi.org/10.1038/s41467-018-08121-w) doi: 10.1038/s41467-018-08121-w
- 443 Rouault, M., Seow, T., Gillan, C. M., & Fleming, S. M. (2018). Psychiatric symptom dimensions are associated with  
444 dissociable shifts in metacognition but not task performance. *Biological psychiatry*, 84(6), 443–451.
- 445 Sepulveda, P., Usher, M., Davies, N., Benson, A., Ortoleva, P., & De Martino, B. (2020). Visual attention modulates  
446 the integration of goal-relevant evidence and not value. *bioRxiv*. Retrieved from [https://www.biorxiv.org/  
447 content/early/2020/07/02/2020.04.14.031971](https://www.biorxiv.org/content/early/2020/07/02/2020.04.14.031971) doi: 10.1101/2020.04.14.031971
- 448 Shannon, C. E. (1948). A mathematical theory of communication. *Bell system technical journal*, 27(3), 379–423.
- 449 Shapiro, A. D., & Grafton, S. T. (2020). Subjective value then confidence in human ventromedial prefrontal cortex.  
450 *Plos one*, 15(2), e0225617.
- 451 Tom, S. M., Fox, C. R., Trepel, C., & Poldrack, R. A. (2007). The neural basis of loss aversion in decision-making  
452 under risk. *Science*, 315(5811), 515–518.
- 453 Vroom, V. H. (1964). *Work and motivation*. New York: Wiley.
- 454 Woolrich, M. W., Behrens, T. E. J., Beckmann, C. F., Jenkinson, M., & Smith, S. M. (2004). Multilevel linear modelling  
455 for FMRI group analysis using Bayesian inference. *Neuroimage*, 21(4), 1732–1747.
- 456 Yeung, N., & Summerfield, C. (2012). Metacognition in human decision-making: confidence and error monitoring.  
457 *Phil. Trans. R. Soc. B*, 367(1594), 1310–1321.
- 458 Zhang, Z., Fanning, J., Ehrlich, D. B., Chen, W., Lee, D., & Levy, I. (2017). Distributed neural representation of  
459 saliency controlled value and category during anticipation of rewards and punishments. *Nature communications*,  
460 8(1), 1–14.
